# Supplementary material for: Synthesis, structures and luminescent properties of a series of novel SrII–LnIII (Ln = Eu, Gd, Tb) coordination polymers
Source: Royal Society of Chemistry journal article supplement (doi:10.1039/c3dt51184g), 2013-01-01

## Supporting Information

### Synthesis, Structure and Luminescence Properties of a Series of Novel Sr<sup>II</sup>-Ln<sup>III</sup> Coordination Polymers

Yanmei Chen,<sup>a</sup> Wenqian Chen,<sup>a</sup> Zhenghua Ju,<sup>b</sup> Qian Gao,<sup>a</sup> Tao Lei,<sup>c</sup> Wei Liu,<sup>a</sup> Yahong Li,<sup>\*a</sup> Dandan Gao<sup>c</sup> and Wu Li<sup>c</sup>

<sup>a</sup> Key Laboratory of Organic Synthesis of Jiangsu Province, College of Chemistry, Chemical Engineering and Materials Science, Soochow University, Suzhou 215123, China. E-mail: [liyahong@suda.edu.cn](mailto:liyahong@suda.edu.cn)

<sup>b</sup> Key Laboratory of Nonferrous Metals Chemistry and Resources Utilization of Gansu Province, College of Chemistry and Chemical Engineering, Lanzhou University, Lanzhou 730000, China.

<sup>c</sup> Qinghai Institute of Salt Lakes, Chinese Academy of Sciences, Xining 810008, China.

|                                                                                                                              |    |
|------------------------------------------------------------------------------------------------------------------------------|----|
| 1. Selected bond lengths [Å] and angles [°] for <b>1-8</b> and hydrogen bond lengths [Å] and angles [°] for <b>1-8</b> ..... | 2  |
| 2. IR spectra of <b>1-8</b> .....                                                                                            | 12 |
| 3. Low-temperature phosphorescence spectra of the complexes <b>2, 5, 6</b> and <b>8</b> .....                                | 15 |
| 4. PXRD spectra of the complexes <b>1-8</b> .....                                                                            | 16 |

**Part 1.** Selected bond lengths [Å] and angles [°] for **1-8** and hydrogen bond lengths [Å] and angles [°] for **1-8**.

**Table S1** Selected bond lengths [Å] and angles [°] for complex **1**.

|                     |           |                      |            |
|---------------------|-----------|----------------------|------------|
| Eu(1)-O(9)          | 2.430(2)  | Sr(2)-O(13)          | 2.538(3)   |
| Eu(1)-O(7)          | 2.434(2)  | Sr(2)-O(4)#1         | 2.569(2)   |
| Eu(1)-O(1)          | 2.444(2)  | Sr(2)-O(12)#2        | 2.601(2)   |
| Eu(1)-O(5)          | 2.447(2)  | Sr(2)-O(15)          | 2.607(2)   |
| Eu(1)-O(3)          | 2.451(2)  | Sr(2)-O(17)          | 2.623(3)   |
| Eu(1)-O(11)         | 2.465(2)  | Sr(2)-O(14)          | 2.647(2)   |
| Eu(1)-N(3)          | 2.515(2)  | Sr(2)-O(2)           | 2.648(2)   |
| Eu(1)-N(2)          | 2.524(3)  | Sr(2)-O(16)          | 2.657(2)   |
| Eu(1)-N(1)          | 2.538(3)  |                      |            |
| O(9)-Eu(1)-O(7)     | 90.87(8)  | O(5)-Eu(1)-N(2)      | 63.46(8)   |
| O(9)-Eu(1)-O(1)     | 151.97(8) | O(3)-Eu(1)-N(2)      | 130.71(8)  |
| O(7)-Eu(1)-O(1)     | 76.31(8)  | O(11)-Eu(1)-N(2)     | 136.72(8)  |
| O(9)-Eu(1)-O(5)     | 77.18(8)  | N(3)-Eu(1)-N(2)      | 118.25(8)  |
| O(7)-Eu(1)-O(5)     | 126.97(8) | O(9)-Eu(1)-N(1)      | 133.49(8)  |
| O(1)-Eu(1)-O(5)     | 90.64(8)  | O(7)-Eu(1)-N(1)      | 135.63(8)  |
| O(9)-Eu(1)-O(3)     | 74.98(8)  | O(1)-Eu(1)-N(1)      | 63.23(8)   |
| O(7)-Eu(1)-O(3)     | 151.09(8) | O(5)-Eu(1)-N(1)      | 73.12(8)   |
| O(1)-Eu(1)-O(3)     | 126.55(8) | O(3)-Eu(1)-N(1)      | 63.33(8)   |
| O(5)-Eu(1)-O(3)     | 75.03(8)  | O(11)-Eu(1)-N(1)     | 75.77(8)   |
| O(9)-Eu(1)-O(11)    | 127.68(7) | N(3)-Eu(1)-N(1)      | 119.06(8)  |
| O(7)-Eu(1)-O(11)    | 76.24(8)  | N(2)-Eu(1)-N(1)      | 122.51(8)  |
| O(1)-Eu(1)-O(11)    | 73.90(7)  | O(13)-Sr(2)-O(4)#1   | 140.05(8)  |
| O(5)-Eu(1)-O(11)    | 148.85(8) | O(13)-Sr(2)-O(12)#2  | 143.98(8)  |
| O(3)-Eu(1)-O(11)    | 92.42(8)  | O(4)#1-Sr(2)-O(12)#2 | 75.02(7)   |
| O(9)-Eu(1)-N(3)     | 64.13(8)  | O(13)-Sr(2)-O(15)    | 81.62(10)  |
| O(7)-Eu(1)-N(3)     | 76.42(8)  | O(4)#1-Sr(2)-O(15)   | 73.05(8)   |
| O(1)-Eu(1)-N(3)     | 133.59(8) | O(12)#2-Sr(2)-O(15)  | 110.03(8)  |
| O(5)-Eu(1)-N(3)     | 135.65(8) | O(13)-Sr(2)-O(17)    | 102.36(11) |
| O(3)-Eu(1)-N(3)     | 74.72(8)  | O(4)#1-Sr(2)-O(17)   | 82.54(10)  |
| O(11)-Eu(1)-N(3)    | 63.56(8)  | O(12)#2-Sr(2)-O(17)  | 87.79(9)   |
| O(9)-Eu(1)-N(2)     | 71.06(8)  | O(15)-Sr(2)-O(17)    | 144.14(9)  |
| O(7)-Eu(1)-N(2)     | 63.79(8)  | O(13)-Sr(2)-O(14)    | 81.24(9)   |
| O(1)-Eu(1)-N(2)     | 80.91(8)  | O(4)#1-Sr(2)-O(14)   | 114.82(8)  |
| O(15)-Sr(2)-O(2)    | 141.24(8) | O(12)#2-Sr(2)-O(14)  | 73.20(8)   |
| O(17)-Sr(2)-O(2)    | 72.71(9)  | O(15)-Sr(2)-O(14)    | 67.06(8)   |
| O(14)-Sr(2)-O(2)    | 78.07(7)  | O(17)-Sr(2)-O(14)    | 148.70(9)  |
| O(13)-Sr(2)-O(16)   | 70.36(9)  | O(13)-Sr(2)-O(2)     | 76.70(8)   |
| O(4)#1-Sr(2)-O(16)  | 73.63(8)  | O(4)#1-Sr(2)-O(2)    | 140.34(7)  |
| O(12)#2-Sr(2)-O(16) | 144.77(8) | O(12)#2-Sr(2)-O(2)   | 73.55(7)   |
| O(15)-Sr(2)-O(16)   | 75.46(8)  | O(17)-Sr(2)-O(16)    | 72.64(9)   |
| O(14)-Sr(2)-O(16)   | 135.64(9) | O(2)-Sr(2)-O(16)     | 124.72(8)  |

Symmetry transformations used to generate equivalent atoms:  
 #1 x+1/2,-y+1/2,z+1/2 #2 -x+1/2,y-1/2,-z+1/2  
 #3 x-1/2,-y+1/2,z-1/2 #4 -x+1/2,y+1/2,-z+1/2

**Table S2** Hydrogen bond lengths [Å] and angles [°] for complex **1**.

| D-H...A                | d(D-H) | d(H...A) | d(D...A) | <(DHA) |
|------------------------|--------|----------|----------|--------|
| N(4)-H(4A)...O(8)#5    | 0.86   | 1.83     | 2.685(4) | 174.9  |
| N(5)-H(5)...O(10)#6    | 0.86   | 1.89     | 2.750(4) | 173.6  |
| O(13)-H(13A)...O(18)#7 | 0.85   | 1.97     | 2.789(4) | 161.7  |
| O(13)-H(13B)...O(1)    | 0.85   | 1.97     | 2.753(3) | 153.3  |
| O(14)-H(14A)...O(2)#4  | 0.85   | 2.32     | 3.119(4) | 156.6  |
| O(14)-H(14A)...O(17)#4 | 0.85   | 2.49     | 3.032(4) | 122.5  |
| O(14)-H(14B)...O(11)   | 0.85   | 2.01     | 2.821(3) | 158.7  |
| O(14)-H(14B)...O(12)   | 0.85   | 2.60     | 3.293(3) | 140.0  |
| O(15)-H(15B)...O(5)#1  | 0.85   | 1.96     | 2.808(3) | 171.6  |
| O(15)-H(15B)...O(6)#1  | 0.85   | 2.50     | 3.067(4) | 125.3  |
| O(16)-H(16A)...O(18)#7 | 0.85   | 2.56     | 3.223(4) | 135.9  |
| O(16)-H(16B)...O(3)#1  | 0.85   | 1.97     | 2.809(4) | 167.9  |
| O(17)-H(17A)...O(12)#8 | 0.85   | 2.53     | 3.237(4) | 141.3  |
| O(17)-H(17B)...O(14)#2 | 0.85   | 2.59     | 3.032(4) | 113.8  |

|                                                             |                            |                            |          |       |
|-------------------------------------------------------------|----------------------------|----------------------------|----------|-------|
| O(18)-H(18A)...O(6)#6                                       | 0.85                       | 2.07                       | 2.894(4) | 164.1 |
| O(18)-H(18B)...O(10)#2                                      | 0.85                       | 2.03                       | 2.826(3) | 155.2 |
| C(18)-H(18)...O(2)#9                                        | 0.93                       | 2.53                       | 3.394(4) | 155.2 |
| C(22)-H(22)...O(9)#4                                        | 0.93                       | 2.57                       | 3.249(4) | 130.2 |
| C(23)-H(23)...O(17)#10                                      | 0.93                       | 2.58                       | 3.444(5) | 155.5 |
| Symmetry transformations used to generate equivalent atoms: |                            |                            |          |       |
| #1 $x+1/2, -y+1/2, z+1/2$                                   | #2 $-x+1/2, y-1/2, -z+1/2$ |                            |          |       |
| #3 $x-1/2, -y+1/2, z-1/2$                                   | #4 $-x+1/2, y+1/2, -z+1/2$ |                            |          |       |
| #5 $x-1/2, -y+3/2, z+1/2$                                   | #6 $x, y, z+1$             | #7 $x+1/2, -y+1/2, z-1/2$  |          |       |
| #8 $x, y-1, z$                                              | #9 $x, y+1, z$             | #10 $x-1/2, -y+1/2, z+1/2$ |          |       |

**Table S3** Selected bond lengths [Å] and angles [°] for complex **2**.

|                   |            |                                                             |                            |
|-------------------|------------|-------------------------------------------------------------|----------------------------|
| Gd(1)-O(3)        | 2.4197(19) | Sr(2)-O(17)                                                 | 2.534(2)                   |
| Gd(1)-O(5)        | 2.424(2)   | Sr(2)-O(12)#1                                               | 2.566(2)                   |
| Gd(1)-O(9)        | 2.431(2)   | Sr(2)-O(2)                                                  | 2.604(2)                   |
| Gd(1)-O(7)        | 2.434(2)   | Sr(2)-O(14)                                                 | 2.607(2)                   |
| Gd(1)-O(11)       | 2.440(2)   | Sr(2)-O(15)                                                 | 2.617(2)                   |
| Gd(1)-O(1)        | 2.455(2)   | Sr(2)-O(10)#2                                               | 2.643(2)                   |
| Gd(1)-N(1)        | 2.497(2)   | Sr(2)-O(13)                                                 | 2.643(2)                   |
| Gd(1)-N(2)        | 2.514(2)   | Sr(2)-O(16)                                                 | 2.645(2)                   |
| Gd(1)-N(3)        | 2.523(2)   | N(1)-Gd(1)-N(3)                                             | 119.11(7)                  |
| O(3)-Gd(1)-O(5)   | 91.03(7)   | N(2)-Gd(1)-N(3)                                             | 122.60(8)                  |
| O(3)-Gd(1)-O(9)   | 151.44(7)  | O(17)-Sr(2)-O(12)#1                                         | 140.49(7)                  |
| O(5)-Gd(1)-O(9)   | 76.19(7)   | O(17)-Sr(2)-O(2)                                            | 143.55(7)                  |
| O(3)-Gd(1)-O(7)   | 76.94(7)   | O(12)#1-Sr(2)-O(2)                                          | 74.93(7)                   |
| O(5)-Gd(1)-O(7)   | 127.59(7)  | O(17)-Sr(2)-O(14)                                           | 81.46(8)                   |
| O(9)-Gd(1)-O(7)   | 90.64(7)   | O(12)#1-Sr(2)-O(14)                                         | 73.43(7)                   |
| O(3)-Gd(1)-O(11)  | 74.70(7)   | O(2)-Sr(2)-O(14)                                            | 109.83(7)                  |
| O(5)-Gd(1)-O(11)  | 150.39(7)  | O(17)-Sr(2)-O(15)                                           | 103.99(9)                  |
| O(9)-Gd(1)-O(11)  | 127.25(7)  | O(12)#1-Sr(2)-O(15)                                         | 81.37(9)                   |
| O(7)-Gd(1)-O(11)  | 75.05(7)   | O(2)-Sr(2)-O(15)                                            | 86.90(8)                   |
| O(3)-Gd(1)-O(1)   | 128.48(7)  | O(14)-Sr(2)-O(15)                                           | 144.25(8)                  |
| O(5)-Gd(1)-O(1)   | 76.20(7)   | O(17)-Sr(2)-O(10)#2                                         | 77.04(7)                   |
| O(9)-Gd(1)-O(1)   | 73.72(7)   | O(12)#1-Sr(2)-O(10)#2                                       | 139.62(7)                  |
| O(7)-Gd(1)-O(1)   | 148.18(7)  | O(2)-Sr(2)-O(10)#2                                          | 73.17(7)                   |
| O(11)-Gd(1)-O(1)  | 92.34(7)   | O(14)-Sr(2)-O(10)#2                                         | 141.40(7)                  |
| O(3)-Gd(1)-N(1)   | 64.53(7)   | O(15)-Sr(2)-O(10)#2                                         | 72.85(8)                   |
| O(5)-Gd(1)-N(1)   | 76.03(7)   | O(17)-Sr(2)-O(13)                                           | 70.55(8)                   |
| O(9)-Gd(1)-N(1)   | 133.56(7)  | O(12)#1-Sr(2)-O(13)                                         | 73.87(7)                   |
| O(7)-Gd(1)-N(1)   | 135.70(7)  | O(2)-Sr(2)-O(13)                                            | 145.14(7)                  |
| O(11)-Gd(1)-N(1)  | 74.42(7)   | O(14)-Sr(2)-O(13)                                           | 75.44(7)                   |
| O(1)-Gd(1)-N(1)   | 63.95(7)   | O(15)-Sr(2)-O(13)                                           | 73.44(8)                   |
| O(3)-Gd(1)-N(2)   | 70.71(7)   | O(10)#2-Sr(2)-O(13)                                         | 124.93(7)                  |
| O(5)-Gd(1)-N(2)   | 64.14(7)   | O(17)-Sr(2)-O(16)                                           | 80.83(8)                   |
| O(9)-Gd(1)-N(2)   | 80.73(7)   | O(12)#1-Sr(2)-O(16)                                         | 114.71(7)                  |
| O(7)-Gd(1)-N(2)   | 63.74(7)   | O(2)-Sr(2)-O(16)                                            | 73.14(7)                   |
| O(11)-Gd(1)-N(2)  | 130.66(7)  | O(14)-Sr(2)-O(16)                                           | 66.55(8)                   |
| O(1)-Gd(1)-N(2)   | 136.85(8)  | O(15)-Sr(2)-O(16)                                           | 148.89(8)                  |
| N(1)-Gd(1)-N(2)   | 118.12(7)  | O(10)#2-Sr(2)-O(16)                                         | 78.55(7)                   |
| O(3)-Gd(1)-N(3)   | 133.48(8)  | O(13)-Sr(2)-O(16)                                           | 135.15(8)                  |
| O(5)-Gd(1)-N(3)   | 135.48(7)  | O(11)-Gd(1)-N(3)                                            | 63.83(7)                   |
| O(9)-Gd(1)-N(3)   | 63.42(7)   | O(1)-Gd(1)-N(3)                                             | 75.24(7)                   |
| O(7)-Gd(1)-N(3)   | 72.97(7)   | Symmetry transformations used to generate equivalent atoms: |                            |
| #1 $-x, -y+1, -z$ |            | #2 $-x+1/2, y-1/2, -z+1/2$                                  | #3 $-x+1/2, y+1/2, -z+1/2$ |

**Table S4** Hydrogen bond lengths [Å] and angles [°] for complex **2**.

| D-H...A                | d(D-H) | d(H...A) | d(D...A) | <(DHA) |
|------------------------|--------|----------|----------|--------|
| O(13)-H(13A)...O(11)#1 | 0.85   | 1.96     | 2.797(3) | 166.1  |
| O(14)-H(14A)...O(8)#1  | 0.85   | 2.26     | 3.061(3) | 157.0  |
| O(14)-H(14B)...O(7)#1  | 0.85   | 2.30     | 2.801(3) | 118.1  |
| O(14)-H(14B)...O(12)#1 | 0.85   | 2.60     | 3.092(3) | 118.2  |
| O(13)-H(13B)...O(18)#2 | 0.85   | 2.57     | 3.204(3) | 132.3  |
| O(15)-H(15A)...O(1)    | 0.85   | 2.54     | 3.288(4) | 146.7  |
| O(15)-H(15A)...O(16)#3 | 0.85   | 2.59     | 3.030(4) | 113.0  |
| O(15)-H(15B)...O(2)#3  | 0.85   | 2.47     | 3.233(4) | 149.6  |

|                        |      |      |          |       |
|------------------------|------|------|----------|-------|
| O(15)-H(15B)...O(2)#3  | 0.85 | 2.47 | 3.233(4) | 149.6 |
| O(16)-H(16A)...O(1)#2  | 0.85 | 1.96 | 2.808(3) | 174.0 |
| O(16)-H(16B)...O(10)#4 | 0.85 | 2.30 | 3.102(3) | 157.9 |
| O(17)-H(17A)...O(9)#2  | 0.85 | 1.98 | 2.748(3) | 149.5 |
| O(17)-H(17B)...O(18)#2 | 0.85 | 2.30 | 2.763(3) | 114.9 |
| O(17)-H(17B)...O(13)   | 0.85 | 2.40 | 2.991(3) | 126.7 |
| O(18)-H(18A)...O(8)#5  | 0.85 | 2.39 | 2.870(3) | 115.9 |
| O(18)-H(18B)...O(4)#6  | 0.85 | 2.01 | 2.797(3) | 153.4 |
| N(4)-H(4)...O(6)       | 0.86 | 1.82 | 2.681(4) | 173.7 |
| N(5)-H(5)...O(4)#7     | 0.86 | 1.89 | 2.747(4) | 171.0 |
| C(2)-H(2)...O(10)#4    | 0.93 | 2.50 | 3.365(4) | 154.5 |
| C(3)-H(3)...O(9)#4     | 0.93 | 2.59 | 3.352(4) | 139.4 |
| C(23)-H(23)...O(15)#2  | 0.93 | 2.54 | 3.406(5) | 154.9 |
| C(24)-H(24)...O(3)#6   | 0.93 | 2.54 | 3.221(4) | 130.4 |

Symmetry transformations used to generate equivalent atoms:  
 #1 -x,-y+1,-z #2 -x+1/2,y-1/2,-z+1/2 #3 -x+1/2,y+1/2,-z+1/2  
 #4 x,y-1,z #5 x+1/2,-y+3/2,z+1/2 #6 -x+1,-y+1,-z  
 #7 x+1/2,-y+1/2,z+1/2

**Table S5** Selected bond lengths [Å] and angles [°] for complex **3**.

|                       |            |                      |            |
|-----------------------|------------|----------------------|------------|
| Tb(1)-O(5)            | 2.404(2)   | Sr(1)-O(15)          | 2.530(3)   |
| Tb(1)-O(3)            | 2.411(3)   | Sr(1)-O(9)           | 2.568(3)   |
| Tb(1)-O(11)#1         | 2.425(3)   | Sr(1)-O(8)           | 2.598(3)   |
| Tb(1)-O(1)            | 2.424(3)   | Sr(1)-O(13)          | 2.615(3)   |
| Tb(1)-O(10)#1         | 2.429(3)   | Sr(1)-O(17)          | 2.632(3)   |
| Tb(1)-O(7)            | 2.440(2)   | Sr(1)-O(14)          | 2.639(3)   |
| Tb(1)-N(2)            | 2.483(3)   | Sr(1)-O(12)#2        | 2.644(3)   |
| Tb(1)-N(1)            | 2.499(3)   | Sr(1)-O(16)          | 2.647(3)   |
| Tb(1)-N(3)#1          | 2.509(3)   |                      |            |
| O(5)-Tb(1)-O(3)       | 90.54(9)   | O(10)#1-Tb(1)-N(2)   | 74.07(9)   |
| O(5)-Tb(1)-O(11)#1    | 150.70(9)  | O(7)-Tb(1)-N(2)      | 64.05(9)   |
| O(3)-Tb(1)-O(11)#1    | 76.45(9)   | O(5)-Tb(1)-N(1)      | 70.99(9)   |
| O(5)-Tb(1)-O(1)       | 77.20(9)   | O(3)-Tb(1)-N(1)      | 64.36(9)   |
| O(3)-Tb(1)-O(1)       | 128.19(9)  | O(11)#1-Tb(1)-N(1)   | 79.71(9)   |
| O(11)#1-Tb(1)-O(1)    | 90.25(10)  | O(1)-Tb(1)-N(1)      | 64.04(9)   |
| O(5)-Tb(1)-O(10)#1    | 74.79(9)   | O(10)#1-Tb(1)-N(1)   | 131.01(9)  |
| O(3)-Tb(1)-O(10)#1    | 149.62(10) | O(7)-Tb(1)-N(1)      | 136.70(9)  |
| O(11)#1-Tb(1)-O(10)#1 | 127.81(9)  | N(2)-Tb(1)-N(1)      | 118.66(10) |
| O(1)-Tb(1)-O(10)#1    | 75.06(9)   | O(5)-Tb(1)-N(3)#1    | 133.75(9)  |
| O(5)-Tb(1)-O(7)       | 128.78(9)  | O(3)-Tb(1)-N(3)#1    | 135.70(9)  |
| O(3)-Tb(1)-O(7)       | 76.27(9)   | O(11)#1-Tb(1)-N(3)#1 | 63.72(9)   |
| O(11)#1-Tb(1)-O(7)    | 74.01(9)   | O(1)-Tb(1)-N(3)#1    | 72.71(9)   |
| O(1)-Tb(1)-O(7)       | 147.56(9)  | O(10)#1-Tb(1)-N(3)#1 | 64.09(9)   |
| O(10)#1-Tb(1)-O(7)    | 92.17(9)   | O(7)-Tb(1)-N(3)#1    | 74.88(9)   |
| O(5)-Tb(1)-N(2)       | 64.74(9)   | N(2)-Tb(1)-N(3)#1    | 118.92(10) |
| O(3)-Tb(1)-N(2)       | 75.61(9)   | N(1)-Tb(1)-N(3)#1    | 122.29(10) |
| O(11)#1-Tb(1)-N(2)    | 133.79(9)  | O(15)-Sr(1)-O(9)     | 140.41(10) |
| O(1)-Tb(1)-N(2)       | 135.84(9)  | O(15)-Sr(1)-O(8)     | 143.87(10) |
| O(9)-Sr(1)-O(12)#2    | 140.71(9)  | O(9)-Sr(1)-O(8)      | 74.89(9)   |
| O(8)-Sr(1)-O(12)#2    | 74.06(9)   | O(15)-Sr(1)-O(13)    | 81.61(12)  |
| O(13)-Sr(1)-O(12)#2   | 140.76(9)  | O(9)-Sr(1)-O(13)     | 73.50(10)  |
| O(17)-Sr(1)-O(12)#2   | 72.78(12)  | O(8)-Sr(1)-O(13)     | 110.41(10) |
| O(14)-Sr(1)-O(12)#2   | 124.33(9)  | O(15)-Sr(1)-O(17)    | 103.34(14) |
| O(15)-Sr(1)-O(16)     | 81.26(12)  | O(9)-Sr(1)-O(17)     | 81.81(13)  |
| O(9)-Sr(1)-O(16)      | 115.03(10) | O(8)-Sr(1)-O(17)     | 86.37(11)  |
| O(8)-Sr(1)-O(16)      | 73.30(10)  | O(13)-Sr(1)-O(17)    | 144.62(12) |
| O(13)-Sr(1)-O(16)     | 67.18(10)  | O(15)-Sr(1)-O(14)    | 70.54(11)  |
| O(17)-Sr(1)-O(16)     | 147.95(12) | O(9)-Sr(1)-O(14)     | 73.66(10)  |
| O(14)-Sr(1)-O(16)     | 135.83(11) | O(8)-Sr(1)-O(14)     | 144.62(10) |
| O(12)#2-Sr(1)-O(16)   | 77.86(9)   | O(13)-Sr(1)-O(14)    | 75.44(10)  |
| O(15)-Sr(1)-O(12)#2   | 75.84(10)  | O(17)-Sr(1)-O(14)    | 73.52(12)  |

Symmetry transformations used to generate equivalent atoms:  
 #1 -x,-y+1,-z #2 x+1/2,-y+3/2,z+1/2  
 #3 x-1/2,-y+3/2,z-1/2

**Table S6** Hydrogen bond lengths [Å] and angles [°] for complex **3**.

| D-H...A | d(D-H) | d(H...A) | d(D...A) | <(DHA) |
|---------|--------|----------|----------|--------|
|---------|--------|----------|----------|--------|

|                        |      |      |          |       |
|------------------------|------|------|----------|-------|
| N(4)-H(4A)...O(6)#4    | 0.86 | 1.90 | 2.755(5) | 172.7 |
| N(5)-H(5)...O(4)#5     | 0.86 | 1.82 | 2.678(5) | 174.4 |
| O(13)-H(13A)...O(2)#1  | 0.85 | 2.33 | 3.052(4) | 142.4 |
| O(13)-H(13B)...O(1)#1  | 0.85 | 2.25 | 2.803(4) | 122.9 |
| O(14)-H(14A)...O(10)   | 0.85 | 2.08 | 2.803(4) | 142.4 |
| O(14)-H(14B)...O(18)#6 | 0.85 | 2.59 | 3.201(5) | 129.6 |
| O(15)-H(15A)...O(18)#6 | 0.85 | 2.00 | 2.791(5) | 154.4 |
| O(15)-H(15A)...O(18)#6 | 0.85 | 2.00 | 2.791(5) | 154.4 |
| O(15)-H(15A)...O(18)#6 | 0.85 | 2.00 | 2.791(5) | 154.4 |
| O(15)-H(15B)...O(11)#2 | 0.85 | 1.94 | 2.742(4) | 156.6 |
| O(16)-H(16A)...O(12)#7 | 0.85 | 2.31 | 3.146(4) | 167.3 |
| O(16)-H(16B)...O(7)#8  | 0.85 | 1.99 | 2.823(4) | 165.2 |
| O(17)-H(17B)...O(16)#9 | 0.85 | 2.23 | 3.014(5) | 152.3 |
| O(18)-H(18A)...O(6)#9  | 0.85 | 2.04 | 2.808(4) | 150.6 |
| O(18)-H(18B)...O(2)#4  | 0.85 | 2.08 | 2.898(5) | 161.5 |
| C(10)-H(10)...O(11)#7  | 0.93 | 2.60 | 3.370(5) | 141.0 |
| C(11)-H(11)...O(12)#7  | 0.93 | 2.52 | 3.380(5) | 153.6 |
| C(22)-H(22)...O(5)#8   | 0.93 | 2.55 | 3.232(5) | 130.3 |
| C(24)-H(24)...O(17)#6  | 0.93 | 2.55 | 3.408(7) | 153.9 |

Symmetry transformations used to generate equivalent atoms:  
 #1 -x,-y+1,-z #2 x+1/2,-y+3/2,z+1/2 #3 x-1/2,-y+3/2,z-1/2  
 #4 x,y,z+1 #5 x-1/2,-y+3/2,z+1/2 #6 -x,-y+1,-z+1  
 #7 -x,-y+2,-z #8 -x+1/2,y+1/2,-z+1/2 #9 -x+1/2,y-1/2,-z+1/2

**Table S7** Selected bond lengths [Å] and angles [°] for complex **4**.

|                  |            |                     |            |
|------------------|------------|---------------------|------------|
| Eu(1)-O(11)      | 2.421(3)   | Sr(1)-O(24)#1       | 2.523(4)   |
| Eu(1)-O(5)       | 2.428(3)   | Sr(1)-O(26)         | 2.562(3)   |
| Eu(1)-O(1)       | 2.446(3)   | Sr(1)-O(2)          | 2.596(3)   |
| Eu(1)-O(9)       | 2.459(3)   | Sr(1)-O(27)         | 2.605(4)   |
| Eu(1)-O(3)       | 2.460(3)   | Sr(1)-O(29)         | 2.610(4)   |
| Eu(1)-O(7)       | 2.467(3)   | Sr(1)-O(14)         | 2.618(3)   |
| Eu(1)-N(1)       | 2.533(3)   | Sr(1)-O(25)         | 2.625(4)   |
| Eu(1)-N(3)       | 2.534(4)   | Sr(1)-O(28)         | 2.659(4)   |
| Eu(1)-N(2)       | 2.534(3)   |                     |            |
| O(11)-Eu(1)-O(5) | 148.61(11) | O(24)#1-Sr(1)-O(26) | 137.89(11) |
| O(11)-Eu(1)-O(1) | 85.64(11)  | O(24)#1-Sr(1)-O(2)  | 73.14(11)  |
| O(5)-Eu(1)-O(1)  | 79.75(11)  | O(26)-Sr(1)-O(2)    | 148.93(11) |
| O(11)-Eu(1)-O(9) | 126.73(11) | O(24)#1-Sr(1)-O(27) | 73.09(12)  |
| O(5)-Eu(1)-O(9)  | 78.20(11)  | O(26)-Sr(1)-O(27)   | 77.67(12)  |
| O(1)-Eu(1)-O(9)  | 80.75(11)  | O(2)-Sr(1)-O(27)    | 123.33(12) |
| O(11)-Eu(1)-O(3) | 76.31(11)  | O(24)#1-Sr(1)-O(29) | 82.72(12)  |
| O(5)-Eu(1)-O(3)  | 90.38(11)  | O(26)-Sr(1)-O(29)   | 106.99(12) |
| O(1)-Eu(1)-O(3)  | 126.66(10) | O(2)-Sr(1)-O(29)    | 69.64(11)  |
| O(9)-Eu(1)-O(3)  | 148.25(11) | O(27)-Sr(1)-O(29)   | 145.65(12) |
| O(11)-Eu(1)-O(7) | 77.60(11)  | O(24)#1-Sr(1)-O(14) | 145.10(10) |
| O(5)-Eu(1)-O(7)  | 127.13(10) | O(26)-Sr(1)-O(14)   | 74.92(11)  |
| O(1)-Eu(1)-O(7)  | 147.66(10) | O(2)-Sr(1)-O(14)    | 74.55(10)  |
| O(9)-Eu(1)-O(7)  | 87.37(11)  | O(27)-Sr(1)-O(14)   | 137.85(11) |
| O(3)-Eu(1)-O(7)  | 76.03(10)  | O(29)-Sr(1)-O(14)   | 73.97(11)  |
| O(11)-Eu(1)-N(1) | 74.11(11)  | O(24)#1-Sr(1)-O(25) | 113.02(14) |
| O(5)-Eu(1)-N(1)  | 74.51(11)  | O(26)-Sr(1)-O(25)   | 82.94(13)  |
| O(1)-Eu(1)-N(1)  | 63.46(11)  | O(2)-Sr(1)-O(25)    | 84.35(12)  |
| O(9)-Eu(1)-N(1)  | 137.94(12) | O(27)-Sr(1)-O(25)   | 69.12(12)  |
| O(3)-Eu(1)-N(1)  | 63.38(11)  | O(29)-Sr(1)-O(25)   | 144.56(12) |
| O(7)-Eu(1)-N(1)  | 134.68(12) | O(14)-Sr(1)-O(25)   | 76.21(12)  |
| O(11)-Eu(1)-N(3) | 64.06(11)  | O(24)#1-Sr(1)-O(28) | 71.40(12)  |
| O(5)-Eu(1)-N(3)  | 134.04(12) | O(26)-Sr(1)-O(28)   | 72.71(11)  |
| O(1)-Eu(1)-N(3)  | 71.27(11)  | O(2)-Sr(1)-O(28)    | 130.80(11) |
| O(9)-Eu(1)-N(3)  | 62.77(11)  | O(27)-Sr(1)-O(28)   | 76.31(12)  |
| O(3)-Eu(1)-N(3)  | 135.55(12) | O(29)-Sr(1)-O(28)   | 73.01(12)  |
| O(7)-Eu(1)-N(3)  | 76.53(11)  | O(14)-Sr(1)-O(28)   | 123.51(12) |
| N(1)-Eu(1)-N(3)  | 119.39(11) | O(25)-Sr(1)-O(28)   | 141.17(12) |
| O(11)-Eu(1)-N(2) | 134.10(12) | O(3)-Eu(1)-N(2)     | 72.01(11)  |
| O(5)-Eu(1)-N(2)  | 63.98(11)  | O(7)-Eu(1)-N(2)     | 63.22(11)  |
| O(1)-Eu(1)-N(2)  | 140.15(12) | N(1)-Eu(1)-N(2)     | 117.44(11) |
| O(9)-Eu(1)-N(2)  | 76.38(11)  | N(3)-Eu(1)-N(2)     | 123.16(12) |

Symmetry transformations used to generate equivalent atoms:  
 #1 x,y-1,z #2 x,y+1,z

**Table S8** Hydrogen bond lengths [Å] and angles [°] for complex **4**.

| D-H...A                | d(D-H) | d(H...A) | d(D...A)  | <(DHA) |
|------------------------|--------|----------|-----------|--------|
| C(2)-H(2)...O(10)#3    | 0.93   | 2.53     | 3.347(6)  | 147.5  |
| C(10)-H(10)...O(31)#4  | 0.93   | 2.48     | 3.369(7)  | 160.2  |
| C(23)-H(23)...O(22)#5  | 0.93   | 2.54     | 3.316(7)  | 141.0  |
| C(37)-H(37)...N(9)     | 0.93   | 2.54     | 3.353(7)  | 146.0  |
| C(45)-H(45)...O(28)    | 0.93   | 2.57     | 3.261(7)  | 131.8  |
| C(46)-H(46)...O(20)#6  | 0.93   | 2.30     | 3.217(7)  | 168.5  |
| C(48)-H(48)...O(12)#7  | 0.93   | 2.28     | 3.182(6)  | 163.7  |
| C(49)-H(49)...O(8)#7   | 0.93   | 2.54     | 3.100(7)  | 118.8  |
| N(7)-H(7)...O(18)      | 0.86   | 1.88     | 2.721(6)  | 165.8  |
| N(8)-H(8)...O(16)#1    | 0.86   | 1.90     | 2.754(6)  | 174.9  |
| N(9)-H(9A)...O(7)#7    | 0.86   | 1.96     | 2.809(5)  | 168.6  |
| N(10)-H(10A)...O(29)#3 | 0.86   | 2.18     | 2.949(6)  | 148.8  |
| N(10)-H(10A)...O(14)#3 | 0.86   | 2.47     | 3.025(5)  | 123.2  |
| N(11)-H(11A)...O(31)   | 0.86   | 2.11     | 2.812(7)  | 138.0  |
| N(11)-H(11A)...O(10)#3 | 0.86   | 2.52     | 3.182(8)  | 133.9  |
| N(12)-H(12)...O(12)#2  | 0.86   | 1.86     | 2.702(6)  | 166.8  |
| N(13)-H(13)...O(3)#2   | 0.86   | 1.94     | 2.795(6)  | 173.4  |
| N(14)-H(14)...O(6)     | 0.86   | 1.76     | 2.615(6)  | 171.2  |
| O(25)-H(25A)...O(13)   | 0.85   | 2.16     | 2.976(5)  | 160.0  |
| O(25)-H(25B)...O(10)#3 | 0.85   | 2.12     | 2.960(5)  | 172.6  |
| O(26)-H(26A)...O(17)   | 0.85   | 1.99     | 2.805(5)  | 161.1  |
| O(26)-H(26B)...O(34)#5 | 0.85   | 1.91     | 2.743(7)  | 165.2  |
| O(27)-H(27A)...O(35)   | 0.85   | 2.14     | 2.947(5)  | 159.0  |
| O(27)-H(27B)...O(19)#1 | 0.85   | 2.01     | 2.834(5)  | 162.4  |
| O(28)-H(28A)...O(23)#1 | 0.85   | 2.22     | 2.797(5)  | 125.2  |
| O(28)-H(28B)...O(34)#5 | 0.85   | 2.49     | 3.275(7)  | 154.6  |
| O(29)-H(29A)...O(1)    | 0.85   | 2.02     | 2.845(5)  | 163.9  |
| O(29)-H(29B)...O(32)#5 | 0.85   | 1.97     | 2.811(6)  | 168.5  |
| O(30)-H(30B)...O(4)#8  | 0.85   | 2.05     | 2.829(5)  | 151.1  |
| O(31)-H(31A)...O(30)   | 0.85   | 2.09     | 2.902(6)  | 159.4  |
| O(31)-H(31B)...O(9)#3  | 0.85   | 2.08     | 2.782(5)  | 140.2  |
| O(32)-H(32A)...O(22)   | 0.85   | 1.94     | 2.710(7)  | 149.8  |
| O(32)-H(32B)...O(35)   | 0.85   | 2.37     | 2.908(6)  | 121.3  |
| O(33)-H(33A)...O(35)   | 0.85   | 2.33     | 2.884(10) | 123.5  |
| O(33)-H(33B)...O(16)#9 | 0.85   | 2.02     | 2.766(9)  | 146.2  |
| O(34)-H(34)...O(32)    | 0.82   | 2.08     | 2.880(8)  | 165.3  |
| O(35)-H(35A)...O(18)   | 0.85   | 2.21     | 2.944(7)  | 145.3  |
| O(35)-H(35B)...O(20)#1 | 0.85   | 1.95     | 2.733(6)  | 152.3  |

Symmetry transformations used to generate equivalent atoms:  
 #1 x,y-1,z #2 x,y+1,z #3 x+1,y,z #4 -x,-y+1,-z+2  
 #5 x-1,y,z #6 -x+1,-y+2,-z+1 #7 x+1,y+1,z  
 #8 -x+1,-y+1,-z+2 #9 x+1,y-1,z

**Table S9** Selected bond lengths [Å] and angles [°] for complex **5**.

|                  |            |                   |            |
|------------------|------------|-------------------|------------|
| Gd(1)-O(11)      | 2.400(3)   | Gd(2)-O(19)       | 2.452(3)   |
| Gd(1)-O(5)       | 2.418(3)   | Gd(2)-O(17)       | 2.465(3)   |
| Gd(1)-O(1)       | 2.440(3)   | Gd(2)-N(6)        | 2.499(4)   |
| Gd(1)-O(9)       | 2.444(3)   | Gd(2)-N(4)        | 2.508(3)   |
| Gd(1)-O(3)       | 2.448(3)   | Gd(2)-N(5)        | 2.521(3)   |
| Gd(1)-O(7)       | 2.454(3)   | O(2)-Sr(3)        | 2.596(3)   |
| Gd(1)-N(3)       | 2.520(4)   | Sr(3)-O(22)#1     | 2.524(3)   |
| Gd(1)-N(2)       | 2.522(3)   | Sr(3)-O(28)       | 2.566(3)   |
| Gd(1)-N(1)       | 2.525(3)   | Sr(3)-O(29)       | 2.605(4)   |
| Gd(2)-O(23)      | 2.423(3)   | Sr(3)-O(26)       | 2.606(3)   |
| Gd(2)-O(15)      | 2.425(3)   | Sr(3)-O(14)       | 2.610(3)   |
| Gd(2)-O(13)      | 2.429(3)   | Sr(3)-O(25)       | 2.630(3)   |
| Gd(2)-O(21)      | 2.440(3)   | Sr(3)-O(27)       | 2.681(4)   |
| O(11)-Gd(1)-O(5) | 147.97(11) | O(15)-Gd(2)-O(21) | 77.19(10)  |
| O(11)-Gd(1)-O(1) | 85.62(10)  | O(13)-Gd(2)-O(21) | 92.05(10)  |
| O(5)-Gd(1)-O(1)  | 79.75(10)  | O(23)-Gd(2)-O(19) | 91.83(11)  |
| O(11)-Gd(1)-O(9) | 127.17(11) | O(15)-Gd(2)-O(19) | 77.33(10)  |
| O(5)-Gd(1)-O(9)  | 78.24(11)  | O(13)-Gd(2)-O(19) | 148.79(10) |
| O(1)-Gd(1)-O(9)  | 80.18(10)  | O(21)-Gd(2)-O(19) | 74.47(10)  |
| O(11)-Gd(1)-O(3) | 76.44(10)  | O(23)-Gd(2)-O(17) | 75.08(11)  |
| O(5)-Gd(1)-O(3)  | 89.95(11)  | O(15)-Gd(2)-O(17) | 88.05(10)  |
| O(1)-Gd(1)-O(3)  | 127.16(9)  | O(13)-Gd(2)-O(17) | 77.14(10)  |



|                     |            |                     |            |
|---------------------|------------|---------------------|------------|
| O(9)-Gd(1)-O(3)     | 148.09(10) | O(21)-Gd(2)-O(17)   | 150.78(10) |
| O(11)-Gd(1)-O(7)    | 77.95(10)  | O(19)-Gd(2)-O(17)   | 127.05(10) |
| O(5)-Gd(1)-O(7)     | 127.38(10) | O(23)-Gd(2)-N(6)    | 64.48(12)  |
| O(1)-Gd(1)-O(7)     | 147.06(10) | O(15)-Gd(2)-N(6)    | 136.69(11) |
| O(9)-Gd(1)-O(7)     | 87.27(10)  | O(13)-Gd(2)-N(6)    | 74.42(10)  |
| O(3)-Gd(1)-O(7)     | 76.49(10)  | O(21)-Gd(2)-N(6)    | 64.09(11)  |
| O(11)-Gd(1)-N(3)    | 64.40(10)  | O(19)-Gd(2)-N(6)    | 74.37(10)  |
| O(5)-Gd(1)-N(3)     | 134.09(10) | O(17)-Gd(2)-N(6)    | 135.24(11) |
| O(1)-Gd(1)-N(3)     | 70.87(10)  | O(23)-Gd(2)-N(4)    | 133.40(11) |
| O(9)-Gd(1)-N(3)     | 62.84(11)  | O(15)-Gd(2)-N(4)    | 63.98(10)  |
| O(3)-Gd(1)-N(3)     | 135.93(10) | O(13)-Gd(2)-N(4)    | 63.89(10)  |
| O(7)-Gd(1)-N(3)     | 76.29(10)  | O(21)-Gd(2)-N(4)    | 74.86(11)  |
| O(11)-Gd(1)-N(2)    | 134.22(10) | O(19)-Gd(2)-N(4)    | 134.76(10) |
| O(5)-Gd(1)-N(2)     | 64.24(10)  | O(17)-Gd(2)-N(4)    | 76.01(11)  |
| O(1)-Gd(1)-N(2)     | 140.08(11) | N(6)-Gd(2)-N(4)     | 119.13(11) |
| O(9)-Gd(1)-N(2)     | 76.29(10)  | O(23)-Gd(2)-N(5)    | 71.64(11)  |
| O(3)-Gd(1)-N(2)     | 71.89(10)  | O(15)-Gd(2)-N(5)    | 77.23(10)  |
| O(7)-Gd(1)-N(2)     | 63.21(11)  | O(13)-Gd(2)-N(5)    | 133.17(11) |
| N(3)-Gd(1)-N(2)     | 123.00(11) | O(21)-Gd(2)-N(5)    | 134.52(10) |
| O(11)-Gd(1)-N(1)    | 73.69(11)  | O(19)-Gd(2)-N(5)    | 63.59(11)  |
| O(5)-Gd(1)-N(1)     | 74.28(11)  | O(17)-Gd(2)-N(5)    | 63.58(10)  |
| O(1)-Gd(1)-N(1)     | 63.84(10)  | N(6)-Gd(2)-N(5)     | 116.68(11) |
| O(9)-Gd(1)-N(1)     | 137.69(10) | N(4)-Gd(2)-N(5)     | 124.16(11) |
| O(3)-Gd(1)-N(1)     | 63.48(9)   | O(22)#1-Sr(3)-O(28) | 138.43(11) |
| O(7)-Gd(1)-N(1)     | 135.04(10) | O(22)#1-Sr(3)-O(2)  | 72.95(10)  |
| N(3)-Gd(1)-N(1)     | 119.30(11) | O(28)-Sr(3)-O(2)    | 148.49(10) |
| N(2)-Gd(1)-N(1)     | 117.69(11) | O(22)#1-Sr(3)-O(29) | 113.21(12) |
| O(23)-Gd(2)-O(15)   | 148.65(11) | O(28)-Sr(3)-O(29)   | 83.04(12)  |
| O(23)-Gd(2)-O(13)   | 74.53(10)  | O(2)-Sr(3)-O(29)    | 85.30(11)  |
| O(15)-Gd(2)-O(13)   | 127.79(10) | O(22)#1-Sr(3)-O(26) | 73.45(11)  |
| O(23)-Gd(2)-O(21)   | 128.57(11) | O(28)-Sr(3)-O(26)   | 77.65(12)  |
| O(2)-Sr(3)-O(25)    | 69.14(11)  | O(2)-Sr(3)-O(26)    | 124.93(11) |
| O(29)-Sr(3)-O(25)   | 144.45(12) | O(29)-Sr(3)-O(26)   | 69.79(12)  |
| O(26)-Sr(3)-O(25)   | 145.36(11) | O(22)#1-Sr(3)-O(14) | 144.86(10) |
| O(14)-Sr(3)-O(25)   | 73.97(10)  | O(28)-Sr(3)-O(14)   | 74.70(10)  |
| O(22)#1-Sr(3)-O(27) | 71.97(11)  | O(2)-Sr(3)-O(14)    | 74.07(9)   |
| O(28)-Sr(3)-O(27)   | 72.81(11)  | O(29)-Sr(3)-O(14)   | 75.52(11)  |
| O(2)-Sr(3)-O(27)    | 129.51(10) | O(26)-Sr(3)-O(14)   | 137.66(9)  |
| O(29)-Sr(3)-O(27)   | 142.22(13) | O(22)#1-Sr(3)-O(25) | 83.26(11)  |
| O(26)-Sr(3)-O(27)   | 76.83(12)  | O(28)-Sr(3)-O(25)   | 105.80(12) |
| O(14)-Sr(3)-O(27)   | 123.03(11) | O(25)-Sr(3)-O(27)   | 71.69(12)  |

Symmetry transformations used to generate equivalent atoms:

#1 x,y+1,z #2 x,y-1,z

**Table S10** Hydrogen bond lengths [Å] and angles [°] for complex **5**.

| D-H...A                | d(D-H) | d(H...A) | d(D...A) | <(DHA) |
|------------------------|--------|----------|----------|--------|
| N(13)-H(13A)...O(16)   | 0.86   | 1.85     | 2.709(5) | 172.1  |
| N(14)-H(14)...O(18)#2  | 0.86   | 1.88     | 2.728(6) | 167.3  |
| O(25)-H(25A)...O(31)#3 | 0.85   | 2.06     | 2.894(6) | 167.5  |
| O(25)-H(25B)...O(1)    | 0.85   | 2.07     | 2.858(5) | 153.9  |
| O(26)-H(26A)...O(19)#1 | 0.85   | 2.04     | 2.817(5) | 150.9  |
| O(26)-H(26A)...O(21)#1 | 0.85   | 2.60     | 3.219(4) | 130.8  |
| O(26)-H(26B)...O(30)   | 0.85   | 2.06     | 2.855(5) | 155.2  |
| O(27)-H(27A)...O(21)#1 | 0.85   | 2.07     | 2.780(5) | 141.1  |
| O(26)-H(26B)...O(30)   | 0.85   | 2.06     | 2.855(5) | 155.2  |
| O(27)-H(27A)...O(21)#1 | 0.85   | 2.07     | 2.780(5) | 141.1  |
| O(28)-H(28B)...O(17)   | 0.85   | 1.99     | 2.803(4) | 159.1  |
| O(29)-H(29A)...O(13)   | 0.85   | 2.20     | 2.916(5) | 141.8  |
| O(28)-H(28A)...O(34)#3 | 0.85   | 2.04     | 2.766(6) | 143.3  |
| O(29)-H(29B)...O(10)#4 | 0.85   | 2.29     | 3.023(5) | 144.6  |
| O(30)-H(30A)...O(18)   | 0.85   | 2.09     | 2.935(5) | 170.5  |
| O(30)-H(30B)...O(20)#1 | 0.85   | 2.33     | 2.750(5) | 110.7  |
| O(31)-H(31A)...O(30)   | 0.85   | 2.02     | 2.830(6) | 158.0  |
| O(31)-H(31B)...O(24)   | 0.85   | 1.97     | 2.730(6) | 148.2  |
| O(32)-H(32A)...O(33)   | 0.85   | 2.17     | 2.863(7) | 138.6  |
| O(32)-H(32B)...O(9)#4  | 0.85   | 1.95     | 2.769(5) | 160.5  |
| O(33)-H(33A)...O(4)#5  | 0.85   | 2.02     | 2.844(5) | 162.2  |
| O(33)-H(33B)...O(8)#6  | 0.85   | 2.04     | 2.880(5) | 167.8  |

|                        |      |      |          |       |
|------------------------|------|------|----------|-------|
| O(34)-H(34)...O(31)    | 0.82 | 2.05 | 2.826(7) | 158.7 |
| N(45)-H(45)...O(6)#4   | 0.86 | 1.76 | 2.611(5) | 171.8 |
| N(47)-H(47)...O(3)#6   | 0.86 | 1.92 | 2.778(5) | 173.5 |
| N(48)-H(48A)...O(25)#4 | 0.86 | 2.22 | 2.985(6) | 148.1 |
| N(48)-H(48A)...O(14)#4 | 0.86 | 2.45 | 3.016(5) | 123.9 |
| N(49)-H(49)...O(7)#6   | 0.86 | 1.96 | 2.807(5) | 167.2 |
| N(51)-H(51)...O(12)#2  | 0.86 | 1.84 | 2.690(5) | 168.5 |
| N(53)-H(53)...O(32)    | 0.86 | 2.20 | 2.839(6) | 130.7 |
| N(53)-H(53)...O(10)#4  | 0.86 | 2.33 | 3.014(7) | 137.0 |
| C(1C)-H(1C)...O(12)#6  | 0.93 | 2.29 | 3.188(6) | 162.8 |
| C(1D)-H(1D)...O(9)#4   | 0.93 | 2.58 | 3.507(6) | 174.0 |
| C(2)-H(2)...O(10)#4    | 0.93 | 2.50 | 3.336(5) | 149.7 |
| C(8)-H(8)...O(4)#5     | 0.93 | 2.38 | 3.136(6) | 137.9 |
| C(12)-H(12)...O(32)#7  | 0.93 | 2.41 | 3.297(7) | 160.0 |
| C(23)-H(23)...O(24)#3  | 0.93 | 2.54 | 3.335(6) | 143.3 |
| C(39)-H(39)...N(49)    | 0.93 | 2.59 | 3.350(7) | 139.5 |
| C(48)-H(48)...O(29)    | 0.93 | 2.47 | 3.311(7) | 149.9 |
| C(50)-H(50)...O(8)#6   | 0.93 | 2.51 | 3.074(7) | 119.3 |
| C(52)-H(52)...O(33)    | 0.93 | 2.58 | 3.479(8) | 162.2 |
| C(55)-H(55)...O(20)#8  | 0.93 | 2.27 | 3.196(6) | 171.6 |

Symmetry transformations used to generate equivalent atoms:

#1 x,y+1,z #2 x,y-1,z #3 x+1,y,z #4 x-1,y,z  
 #5 -x+1,-y+2,-z #6 x-1,y-1,z #7 -x+2,-y+2,-z  
 #8 -x+1,-y,-z+1

**Table S11** Selected bond lengths [Å] and angles [°] for complex **6**.

|                  |          |                       |           |
|------------------|----------|-----------------------|-----------|
| Gd(1)-O(5)       | 2.398(6) | Sr(2)-O(2)            | 2.533(6)  |
| Gd(1)-O(9)       | 2.406(6) | Sr(2)-O(15)           | 2.540(9)  |
| Gd(1)-O(3)       | 2.413(6) | Sr(2)-O(8)#2          | 2.575(7)  |
| Gd(1)-O(11)      | 2.435(6) | Sr(2)-O(13)           | 2.618(9)  |
| Gd(1)-O(1)       | 2.452(6) | Sr(2)-O(16')          | 2.642(12) |
| Gd(1)-O(7)       | 2.456(6) | Sr(2)-O(14)           | 2.644(9)  |
| Gd(1)-N(3)       | 2.500(7) | Sr(2)-O(16)           | 2.748(13) |
| Gd(1)-N(2)       | 2.506(8) | Sr(2)-O(16')#3        | 2.935(15) |
| Gd(1)-N(1)       | 2.510(7) | Sr(2)-O(14)#3         | 3.143(15) |
| Sr(2)-O(4)#1     | 2.524(7) |                       |           |
| O(5)-Gd(1)-O(9)  | 78.1(2)  | O(4)#1-Sr(2)-O(8)#2   | 146.3(2)  |
| O(5)-Gd(1)-O(3)  | 148.7(2) | O(2)-Sr(2)-O(8)#2     | 72.2(2)   |
| O(9)-Gd(1)-O(3)  | 90.8(2)  | O(15)-Sr(2)-O(8)#2    | 88.6(3)   |
| O(5)-Gd(1)-O(11) | 88.0(2)  | O(4)#1-Sr(2)-O(13)    | 92.7(3)   |
| O(9)-Gd(1)-O(11) | 128.2(2) | O(2)-Sr(2)-O(13)      | 72.0(2)   |
| O(3)-Gd(1)-O(11) | 76.0(2)  | O(15)-Sr(2)-O(13)     | 151.5(3)  |
| O(5)-Gd(1)-O(1)  | 79.0(2)  | O(8)#2-Sr(2)-O(13)    | 83.8(3)   |
| O(9)-Gd(1)-O(1)  | 78.9(2)  | O(4)#1-Sr(2)-O(16')   | 132.0(3)  |
| O(3)-Gd(1)-O(1)  | 127.9(2) | O(2)-Sr(2)-O(16')     | 148.2(3)  |
| O(11)-Gd(1)-O(1) | 146.9(2) | O(15)-Sr(2)-O(16')    | 89.0(4)   |
| O(5)-Gd(1)-O(7)  | 128.3(2) | O(8)#2-Sr(2)-O(16')   | 78.0(3)   |
| O(9)-Gd(1)-O(7)  | 147.1(2) | O(13)-Sr(2)-O(16')    | 116.0(4)  |
| O(3)-Gd(1)-O(7)  | 74.6(2)  | O(4)#1-Sr(2)-O(14)    | 75.2(3)   |
| O(11)-Gd(1)-O(7) | 77.4(2)  | O(2)-Sr(2)-O(14)      | 150.0(3)  |
| O(1)-Gd(1)-O(7)  | 87.0(2)  | O(15)-Sr(2)-O(14)     | 93.9(4)   |
| O(5)-Gd(1)-N(3)  | 76.2(2)  | O(8)#2-Sr(2)-O(14)    | 137.3(3)  |
| O(9)-Gd(1)-N(3)  | 64.8(2)  | O(13)-Sr(2)-O(14)     | 110.2(4)  |
| O(3)-Gd(1)-N(3)  | 72.7(2)  | O(16')-Sr(2)-O(14)    | 59.5(3)   |
| O(11)-Gd(1)-N(3) | 63.4(2)  | O(4)#1-Sr(2)-O(16)    | 122.1(4)  |
| O(1)-Gd(1)-N(3)  | 139.3(2) | O(2)-Sr(2)-O(16)      | 131.1(5)  |
| O(7)-Gd(1)-N(3)  | 133.6(2) | O(15)-Sr(2)-O(16)     | 62.7(5)   |
| O(5)-Gd(1)-N(2)  | 64.4(2)  | O(8)#2-Sr(2)-O(16)    | 76.8(4)   |
| O(9)-Gd(1)-N(2)  | 135.9(2) | O(13)-Sr(2)-O(16)     | 140.4(4)  |
| O(3)-Gd(1)-N(2)  | 133.2(2) | O(16')-Sr(2)-O(16)    | 26.4(4)   |
| O(11)-Gd(1)-N(2) | 74.9(2)  | O(14)-Sr(2)-O(16)     | 66.9(4)   |
| O(1)-Gd(1)-N(2)  | 72.1(2)  | O(4)#1-Sr(2)-O(16')#3 | 89.7(3)   |
| O(7)-Gd(1)-N(2)  | 63.9(2)  | O(2)-Sr(2)-O(16')#3   | 128.9(3)  |
| N(3)-Gd(1)-N(2)  | 122.6(2) | O(15)-Sr(2)-O(16')#3  | 145.4(3)  |
| O(5)-Gd(1)-N(1)  | 137.2(2) | O(8)#2-Sr(2)-O(16')#3 | 116.6(3)  |
| O(9)-Gd(1)-N(1)  | 74.7(2)  | O(13)-Sr(2)-O(16')#3  | 60.2(3)   |
| O(3)-Gd(1)-N(1)  | 64.1(2)  | O(16')-Sr(2)-O(16')#3 | 74.9(5)   |
| O(11)-Gd(1)-N(1) | 134.8(2) | O(14)-Sr(2)-O(16')#3  | 51.5(4)   |



|                        |          |                      |          |
|------------------------|----------|----------------------|----------|
| O(1)-Gd(1)-N(1)        | 63.9(2)  | O(16)-Sr(2)-O(16')#3 | 98.6(5)  |
| O(7)-Gd(1)-N(1)        | 72.4(2)  | O(4)#1-Sr(2)-O(14)#3 | 140.5(2) |
| N(3)-Gd(1)-N(1)        | 119.1(2) | O(2)-Sr(2)-O(14)#3   | 124.9(2) |
| N(2)-Gd(1)-N(1)        | 118.2(2) | O(15)-Sr(2)-O(14)#3  | 134.2(3) |
| O(4)#1-Sr(2)-O(2)      | 74.8(2)  | O(8)#2-Sr(2)-O(14)#3 | 68.0(2)  |
| O(4)#1-Sr(2)-O(15)     | 78.6(3)  | O(13)-Sr(2)-O(14)#3  | 67.3(3)  |
| O(2)-Sr(2)-O(15)       | 79.5(2)  | O(16')-Sr(2)-O(14)#3 | 48.9(4)  |
| O(16)-Sr(2)-O(14)#3    | 73.5(5)  | O(14)-Sr(2)-O(14)#3  | 80.4(4)  |
| O(16')#3-Sr(2)-O(14)#3 | 51.0(3)  |                      |          |

Symmetry transformations used to generate equivalent atoms:  
 #1 x-1,y,z #2 -x+2,-y+1,-z #3 -x+1,-y+1,-z  
 #4 x+1,y,z

**Table S12** Hydrogen bond lengths [Å] and angles [°] for complex **6**.

| D-H...A                | d(D-H) | d(H...A) | d(D...A)  | <(DHA) |
|------------------------|--------|----------|-----------|--------|
| N(4)-H(4A)...O(18)     | 0.86   | 2.03     | 2.862(14) | 164.1  |
| N(5)-H(5)...O(10)      | 0.86   | 1.85     | 2.702(13) | 168.2  |
| O(13)-H(13A)...O(19)#3 | 0.85   | 2.19     | 3.04(2)   | 172.5  |
| O(13)-H(13B)...O(1)    | 0.85   | 1.99     | 2.769(11) | 152.0  |
| O(13)-H(13B)...O(2)    | 0.85   | 2.56     | 3.029(11) | 116.2  |
| O(14)-H(14A)...O(7)#1  | 0.85   | 2.01     | 2.727(11) | 140.8  |
| O(14)-H(14B)...O(13)#3 | 0.85   | 2.54     | 3.220(13) | 137.3  |
| O(15)-H(15A)...O(12)#5 | 0.85   | 1.91     | 2.747(10) | 169.5  |
| O(15)-H(15B)...O(6)#6  | 0.85   | 1.97     | 2.686(11) | 140.9  |
| O(17)-H(17A)...O(18)   | 0.85   | 2.55     | 3.11(2)   | 124.5  |
| O(17)-H(17B)...O(6)#6  | 0.85   | 2.23     | 2.946(14) | 141.7  |
| O(18)-H(18A)...O(4)#1  | 0.85   | 2.27     | 2.963(12) | 138.3  |
| O(18)-H(18A)...O(2)    | 0.85   | 2.44     | 3.096(12) | 134.0  |
| O(18)-H(18B)...O(10)#7 | 0.85   | 2.50     | 3.235(17) | 144.6  |
| O(19)-H(19A)...O(12)#2 | 0.85   | 2.13     | 2.67(2)   | 121.2  |
| O(19)-H(19B)...O(12)#5 | 0.85   | 2.54     | 2.965(19) | 111.9  |
| C(2)-H(2)...O(6)#6     | 0.93   | 2.52     | 3.238(11) | 134.2  |
| C(22)-H(22)...O(9)     | 0.93   | 2.53     | 3.115(15) | 121.4  |

Symmetry transformations used to generate equivalent atoms:  
 #1 x-1,y,z #2 -x+2,-y+1,-z #3 -x+1,-y+1,-z  
 #4 x+1,y,z #5 x-1,y-1,z #6 x,y-1,z #7 -x+1,-y+1,-z+1

**Table S13** Selected bond lengths [Å] and angles [°] for complex **7**.

|                  |            |                      |           |
|------------------|------------|----------------------|-----------|
| Tb(1)-O(9)       | 2.380(5)   | Sr(2)-O(16)          | 2.523(8)  |
| Tb(1)-O(3)       | 2.380(5)   | Sr(2)-O(2)           | 2.538(5)  |
| Tb(1)-O(5)       | 2.394(5)   | Sr(2)-O(12)#2        | 2.556(6)  |
| Tb(1)-O(7)       | 2.406(5)   | Sr(2)-O(13)          | 2.581(8)  |
| Tb(1)-O(1)       | 2.419(5)   | Sr(2)-O(15)          | 2.619(10) |
| Tb(1)-O(11)      | 2.423(5)   | Sr(2)-O(17)          | 2.651(10) |
| Tb(1)-N(2)       | 2.472(6)   | Sr(2)-O(15')         | 2.746(14) |
| Tb(1)-N(1)       | 2.479(6)   | Sr(2)-O(17')         | 2.756(14) |
| Tb(1)-N(3)       | 2.484(6)   | Sr(2)-O(15)#3        | 2.837(11) |
| Sr(2)-O(4)#1     | 2.507(6)   | Sr(2)-O(17)#3        | 2.927(12) |
| O(9)-Tb(1)-O(3)  | 148.00(19) | O(16)-Sr(2)-O(15)    | 100.5(3)  |
| O(9)-Tb(1)-O(5)  | 78.5(2)    | O(2)-Sr(2)-O(15)     | 154.3(2)  |
| O(3)-Tb(1)-O(5)  | 90.3(2)    | O(12)#2-Sr(2)-O(15)  | 133.5(3)  |
| O(9)-Tb(1)-O(7)  | 88.0(2)    | O(13)-Sr(2)-O(15)    | 104.6(3)  |
| O(3)-Tb(1)-O(7)  | 75.73(19)  | O(4)#1-Sr(2)-O(17)   | 132.1(3)  |
| O(5)-Tb(1)-O(7)  | 128.67(17) | O(16)-Sr(2)-O(17)    | 88.3(3)   |
| O(9)-Tb(1)-O(1)  | 79.19(18)  | O(2)-Sr(2)-O(17)     | 147.8(3)  |
| O(3)-Tb(1)-O(1)  | 128.41(18) | O(12)#2-Sr(2)-O(17)  | 77.9(3)   |
| O(5)-Tb(1)-O(1)  | 79.24(17)  | O(13)-Sr(2)-O(17)    | 115.9(3)  |
| O(7)-Tb(1)-O(1)  | 146.39(18) | O(15)-Sr(2)-O(17)    | 57.1(3)   |
| O(9)-Tb(1)-O(11) | 128.62(18) | O(4)#1-Sr(2)-O(15')  | 68.8(3)   |
| O(3)-Tb(1)-O(11) | 74.86(18)  | O(16)-Sr(2)-O(15')   | 83.5(4)   |
| O(5)-Tb(1)-O(11) | 146.6(2)   | O(2)-Sr(2)-O(15')    | 142.2(3)  |
| O(7)-Tb(1)-O(11) | 77.10(17)  | O(12)#2-Sr(2)-O(15') | 141.0(3)  |
| O(1)-Tb(1)-O(11) | 86.83(17)  | O(13)-Sr(2)-O(15')   | 118.9(4)  |
| O(9)-Tb(1)-N(2)  | 76.14(19)  | O(15)-Sr(2)-O(15')   | 18.7(3)   |
| O(3)-Tb(1)-N(2)  | 72.0(2)    | O(17)-Sr(2)-O(15')   | 63.9(4)   |
| O(5)-Tb(1)-N(2)  | 64.82(18)  | O(4)#1-Sr(2)-O(17')  | 122.1(3)  |

|                      |            |                       |          |
|----------------------|------------|-----------------------|----------|
| O(7)-Tb(1)-N(2)      | 63.87(18)  | O(16)-Sr(2)-O(17')    | 61.7(3)  |
| O(1)-Tb(1)-N(2)      | 139.57(18) | O(2)-Sr(2)-O(17')     | 130.2(3) |
| O(11)-Tb(1)-N(2)     | 133.52(18) | O(12)#2-Sr(2)-O(17')  | 76.5(3)  |
| O(9)-Tb(1)-N(1)      | 137.33(19) | O(13)-Sr(2)-O(17')    | 140.5(4) |
| O(3)-Tb(1)-N(1)      | 64.65(18)  | O(15)-Sr(2)-O(17')    | 68.5(4)  |
| O(5)-Tb(1)-N(1)      | 74.51(19)  | O(17)-Sr(2)-O(17')    | 26.7(4)  |
| O(7)-Tb(1)-N(1)      | 134.62(19) | O(15')-Sr(2)-O(17')   | 66.1(4)  |
| O(1)-Tb(1)-N(1)      | 63.86(18)  | O(4)#1-Sr(2)-O(15)#3  | 141.4(2) |
| O(11)-Tb(1)-N(1)     | 72.12(19)  | O(16)-Sr(2)-O(15)#3   | 131.0(3) |
| N(2)-Tb(1)-N(1)      | 119.04(19) | O(2)-Sr(2)-O(15)#3    | 127.3(2) |
| O(9)-Tb(1)-N(3)      | 64.35(19)  | O(12)#2-Sr(2)-O(15)#3 | 68.3(3)  |
| O(3)-Tb(1)-N(3)      | 133.4(2)   | O(13)-Sr(2)-O(15)#3   | 70.1(3)  |
| O(5)-Tb(1)-N(3)      | 136.3(2)   | O(15)-Sr(2)-O(15)#3   | 71.9(4)  |
| O(7)-Tb(1)-N(3)      | 74.2(2)    | O(17)-Sr(2)-O(15)#3   | 46.0(3)  |
| O(1)-Tb(1)-N(3)      | 72.20(19)  | O(15')-Sr(2)-O(15)#3  | 89.0(4)  |
| O(11)-Tb(1)-N(3)     | 64.30(19)  | O(17')-Sr(2)-O(15)#3  | 70.9(4)  |
| N(2)-Tb(1)-N(3)      | 122.4(2)   | O(4)#1-Sr(2)-O(17)#3  | 89.6(2)  |
| N(1)-Tb(1)-N(3)      | 118.44(19) | O(16)-Sr(2)-O(17)#3   | 145.6(3) |
| C(6)-O(1)-Tb(1)      | 125.2(5)   | O(2)-Sr(2)-O(17)#3    | 128.9(2) |
| N(1)-C(1)-C(2)       | 122.1(7)   | O(12)#2-Sr(2)-O(17)#3 | 116.6(3) |
| N(1)-C(1)-C(6)       | 113.8(6)   | O(13)-Sr(2)-O(17)#3   | 59.9(3)  |
| C(2)-C(1)-C(6)       | 124.0(6)   | O(15)-Sr(2)-O(17)#3   | 45.3(3)  |
| C(5)-N(1)-C(1)       | 119.2(6)   | O(17)-Sr(2)-O(17)#3   | 75.4(4)  |
| C(5)-N(1)-Tb(1)      | 119.6(5)   | O(15')-Sr(2)-O(17)#3  | 62.2(4)  |
| C(1)-N(1)-Tb(1)      | 121.2(5)   | O(17')-Sr(2)-O(17)#3  | 99.5(4)  |
| O(4)#1-Sr(2)-O(16)   | 79.1(2)    | O(15)#3-Sr(2)-O(17)#3 | 51.8(3)  |
| O(4)#1-Sr(2)-O(2)    | 74.87(17)  | O(4)#1-Sr(2)-O(13)    | 92.9(3)  |
| O(16)-Sr(2)-O(2)     | 79.5(2)    | O(16)-Sr(2)-O(13)     | 151.9(2) |
| O(4)#1-Sr(2)-O(12)#2 | 146.22(19) | O(2)-Sr(2)-O(13)      | 72.4(2)  |
| O(16)-Sr(2)-O(12)#2  | 88.2(2)    | O(12)#2-Sr(2)-O(13)   | 83.7(3)  |
| O(2)-Sr(2)-O(12)#2   | 72.07(18)  | O(4)#1-Sr(2)-O(15)    | 79.9(3)  |

Symmetry transformations used to generate equivalent atoms:

|            |               |             |            |
|------------|---------------|-------------|------------|
| #1 x-1,y,z | #2 -x+1,-y,-z | #3 -x,-y,-z | #4 x+1,y,z |
|------------|---------------|-------------|------------|

**Table S14** Hydrogen bond lengths [Å] and angles [°] for complex **7**.

| D-H...A                 | d(D-H)    | d(H...A) | d(D...A)  | <(DHA)  |
|-------------------------|-----------|----------|-----------|---------|
| O(13)-H(13A)...O(1)     | 0.850(10) | 2.06(6)  | 2.779(9)  | 142(9)  |
| O(13)-H(13B)...O(14)#3  | 0.852(10) | 2.53(10) | 3.06(2)   | 121(10) |
| O(14)-H(14A)...O(8)#2   | 0.87      | 2.19     | 2.653(18) | 112.8   |
| O(14)-H(14A)...O(17)    | 0.87      | 2.33     | 2.83(2)   | 116.7   |
| O(14)-H(14A)...O(17')   | 0.87      | 1.63     | 1.99(2)   | 100.9   |
| O(14)-H(14B)...O(15')   | 0.88      | 2.40     | 3.25(2)   | 160.9   |
| O(16)-H(16A)...O(8)#5   | 0.85      | 1.91     | 2.751(9)  | 169.5   |
| O(16)-H(16B)...O(10)#6  | 0.85      | 1.86     | 2.706(9)  | 176.7   |
| O(18)-H(18A)...O(9)     | 0.88      | 2.44     | 3.309(15) | 170.3   |
| O(18)-H(18A)...O(10)    | 0.88      | 2.44     | 2.973(13) | 119.6   |
| O(18)-H(18B)...O(19)#1  | 0.85      | 2.44     | 3.14(2)   | 141.0   |
| O(19)-H(19A)...O(2)#7   | 0.85      | 2.32     | 3.089(10) | 150.3   |
| O(19)-H(19A)...O(4)#8   | 0.85      | 2.33     | 2.916(10) | 126.9   |
| O(19)-H(19B)...O(6)#9   | 0.85      | 2.55     | 3.179(15) | 132.0   |
| N(22)-H(22A)...O(6)#10  | 0.86      | 1.87     | 2.708(11) | 164.8   |
| N(23)-H(23A)...O(19)#11 | 0.86      | 2.02     | 2.843(12) | 160.3   |
| C(2)-H(2)...O(10)#6     | 0.93      | 2.51     | 3.236(10) | 135.4   |
| C(22)-H(22)...O(5)#10   | 0.93      | 2.58     | 3.167(14) | 121.1   |

Symmetry transformations used to generate equivalent atoms:

|                   |                  |                    |            |
|-------------------|------------------|--------------------|------------|
| #1 x-1,y,z        | #2 -x+1,-y,-z    | #3 -x,-y,-z        | #4 x+1,y,z |
| #5 x-1,y-1,z      | #6 x,y-1,z       | #7 x+1,y+1,z       | #8 x,y+1,z |
| #9 -x+1,-y+1,-z+1 | #10 -x+1,-y,-z+1 | #11 -x+2,-y+1,-z+1 |            |

**Table S15** Selected bond lengths [Å] and angles [°] for complex **8**.

|             |          |              |          |
|-------------|----------|--------------|----------|
| Gd(1)-O(7)  | 2.429(2) | O(2)-Sr(2)   | 2.560(2) |
| Gd(1)-O(1)  | 2.429(2) | O(2)-Sr(2)#1 | 2.736(2) |
| Gd(1)-O(11) | 2.433(2) | Sr(2)-O(17)  | 2.563(2) |
| Gd(1)-O(5)  | 2.440(2) | Sr(2)-O(13)  | 2.574(3) |
| Gd(1)-O(3)  | 2.448(2) | Sr(2)-O(14)  | 2.583(3) |
| Gd(1)-O(9)  | 2.467(2) | Sr(2)-O(8)#2 | 2.584(2) |

|                  |           |                     |            |
|------------------|-----------|---------------------|------------|
| Gd(1)-N(2)       | 2.509(3)  | Sr(2)-O(16)         | 2.622(3)   |
| Gd(1)-N(1)       | 2.518(2)  | Sr(2)-O(15)         | 2.648(3)   |
| Gd(1)-N(3)       | 2.520(3)  | Sr(2)-O(2)#1        | 2.736(2)   |
| O(7)-Gd(1)-O(1)  | 91.04(8)  | O(9)-Gd(1)-N(3)     | 63.25(8)   |
| O(7)-Gd(1)-O(11) | 77.04(7)  | N(2)-Gd(1)-N(3)     | 124.21(8)  |
| O(1)-Gd(1)-O(11) | 151.46(7) | N(1)-Gd(1)-N(3)     | 118.90(8)  |
| O(7)-Gd(1)-O(5)  | 127.48(8) | O(3)-Gd(1)-N(3)     | 72.95(8)   |
| O(1)-Gd(1)-O(5)  | 77.13(8)  | Sr(2)-O(2)-Sr(2)#1  | 113.89(8)  |
| O(11)-Gd(1)-O(5) | 89.59(8)  | O(2)-Sr(2)-O(17)    | 140.68(7)  |
| O(7)-Gd(1)-O(3)  | 77.29(8)  | O(2)-Sr(2)-O(13)    | 82.01(11)  |
| O(1)-Gd(1)-O(3)  | 127.10(7) | O(17)-Sr(2)-O(13)   | 92.34(12)  |
| O(11)-Gd(1)-O(3) | 75.96(8)  | O(2)-Sr(2)-O(14)    | 126.95(9)  |
| O(5)-Gd(1)-O(3)  | 148.15(8) | O(13)-Sr(2)-O(14)   | 142.15(10) |
| O(7)-Gd(1)-O(9)  | 148.28(8) | O(2)-Sr(2)-O(8)#2   | 75.36(7)   |
| O(1)-Gd(1)-O(9)  | 74.93(7)  | O(17)-Sr(2)-O(8)#2  | 143.95(8)  |
| O(11)-Gd(1)-O(9) | 127.21(7) | O(13)-Sr(2)-O(8)#2  | 94.82(12)  |
| O(5)-Gd(1)-O(9)  | 77.67(8)  | O(14)-Sr(2)-O(8)#2  | 73.71(9)   |
| O(3)-Gd(1)-O(9)  | 88.60(8)  | O(2)-Sr(2)-O(16)    | 84.90(8)   |
| O(7)-Gd(1)-N(2)  | 63.88(8)  | O(17)-Sr(2)-O(16)   | 78.80(9)   |
| O(1)-Gd(1)-N(2)  | 72.40(8)  | O(13)-Sr(2)-O(16)   | 146.67(10) |
| O(11)-Gd(1)-N(2) | 79.07(8)  | O(14)-Sr(2)-O(16)   | 68.09(9)   |
| O(5)-Gd(1)-N(2)  | 63.76(8)  | O(8)#2-Sr(2)-O(16)  | 111.29(9)  |
| O(3)-Gd(1)-N(2)  | 137.53(8) | O(2)-Sr(2)-O(15)    | 134.85(9)  |
| O(9)-Gd(1)-N(2)  | 133.69(8) | O(17)-Sr(2)-O(15)   | 76.55(9)   |
| O(7)-Gd(1)-N(1)  | 73.53(8)  | O(13)-Sr(2)-O(15)   | 69.48(11)  |
| O(1)-Gd(1)-N(1)  | 63.83(8)  | O(14)-Sr(2)-O(15)   | 72.67(10)  |
| O(11)-Gd(1)-N(1) | 133.76(8) | O(8)#2-Sr(2)-O(15)  | 73.10(9)   |
| O(5)-Gd(1)-N(1)  | 136.65(8) | O(16)-Sr(2)-O(15)   | 136.73(10) |
| O(3)-Gd(1)-N(1)  | 63.37(8)  | O(2)-Sr(2)-O(2)#1   | 66.11(8)   |
| O(9)-Gd(1)-N(1)  | 74.75(8)  | O(17)-Sr(2)-O(2)#1  | 74.80(7)   |
| N(2)-Gd(1)-N(1)  | 116.87(8) | O(13)-Sr(2)-O(2)#1  | 75.23(10)  |
| O(7)-Gd(1)-N(3)  | 135.30(8) | O(14)-Sr(2)-O(2)#1  | 135.12(8)  |
| O(1)-Gd(1)-N(3)  | 133.58(8) | O(8)#2-Sr(2)-O(2)#1 | 141.09(7)  |
| O(11)-Gd(1)-N(3) | 63.97(8)  | O(16)-Sr(2)-O(2)#1  | 71.44(8)   |
| O(5)-Gd(1)-N(3)  | 75.20(8)  | O(15)-Sr(2)-O(2)#1  | 132.94(8)  |

Symmetry transformations used to generate equivalent atoms:

#1 -x+1,-y+1,-z+1 #2 -x+1,-y+2,-z+1

**Table S16** Hydrogen bond lengths [Å] and angles [°] for complex **8**.

| D-H...A                | d(D-H)  | d(H...A) | d(D...A) | <(DHA) |
|------------------------|---------|----------|----------|--------|
| N(4)-H(4A)...O(10)#3   | 0.86    | 1.86     | 2.712(4) | 168.4  |
| O(13)-H(13A)...O(20)#1 | 0.85    | 2.19     | 2.951(7) | 149.1  |
| O(13)-H(13B)...O(6)#4  | 0.85    | 2.22     | 3.022(4) | 157.9  |
| O(14)-H(14A)...O(19)#5 | 0.85    | 2.11     | 2.903(5) | 155.1  |
| O(14)-H(14B)...O(11)#2 | 0.85    | 1.98     | 2.824(3) | 173.9  |
| O(15)-H(15A)...O(7)#2  | 0.82(5) | 1.98(5)  | 2.762(4) | 161(5) |
| O(15)-H(15B)...O(21)   | 0.81(5) | 2.09(5)  | 2.772(8) | 142(5) |
| O(16)-H(16A)...O(6)#6  | 0.85    | 1.97     | 2.785(4) | 160.6  |
| O(16)-H(16B)...O(1)#1  | 0.85    | 2.09     | 2.860(3) | 150.3  |
| O(18)-H(18D)...O(17)#1 | 0.85    | 2.15     | 2.769(5) | 129.3  |
| O(19)-H(19A)...O(10)#6 | 0.85    | 2.06     | 2.902(5) | 170.6  |
| O(19)-H(19C)...O(12)#7 | 0.85    | 1.86     | 2.700(4) | 168.0  |
| O(20)-H(20A)...O(5)#6  | 0.85    | 2.07     | 2.902(5) | 166.2  |
| O(20)-H(20A)...O(6)#6  | 0.85    | 2.48     | 3.102(5) | 130.9  |
| O(20)-H(20B)...O(18)   | 0.85    | 2.09     | 2.793(6) | 139.6  |
| N(23)-H(23)...O(4)     | 0.86    | 1.85     | 2.703(4) | 173.4  |
| O(21)-H(21B)...O(19)#1 | 0.85    | 2.19     | 2.905(9) | 141.4  |
| O(21)-H(21B)...O(20)#1 | 0.85    | 2.40     | 3.127(9) | 144.3  |

Symmetry transformations used to generate equivalent atoms:

#1 -x+1,-y+1,-z+1 #2 -x+1,-y+2,-z+1 #3 x,y+1,z  
 #4 -x+2,-y+1,-z+1 #5 -x,-y+1,-z+1 #6 x-1,y,z #7 x-1,y-1,z

## Part 2. IR spectra of 1-8.

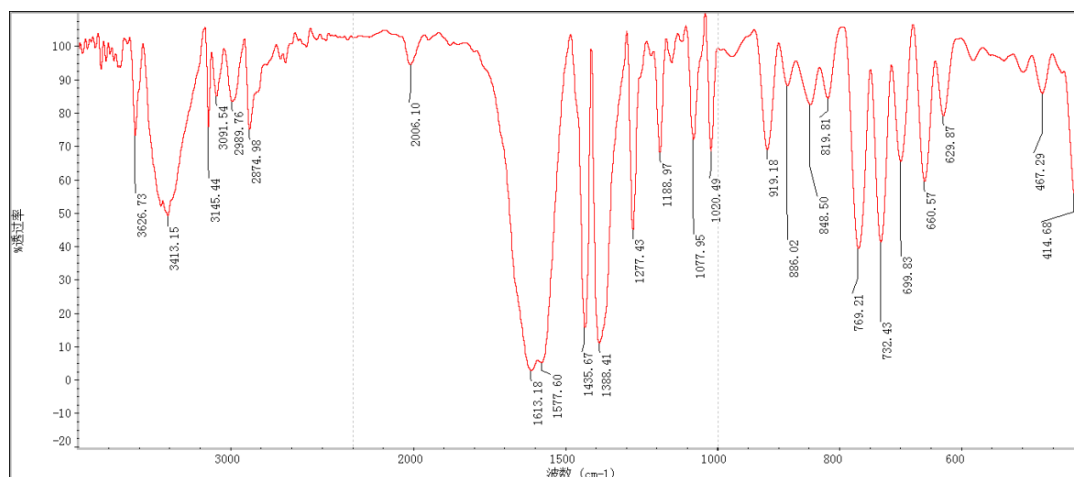

Fig. S1 IR spectrum of complex 1.

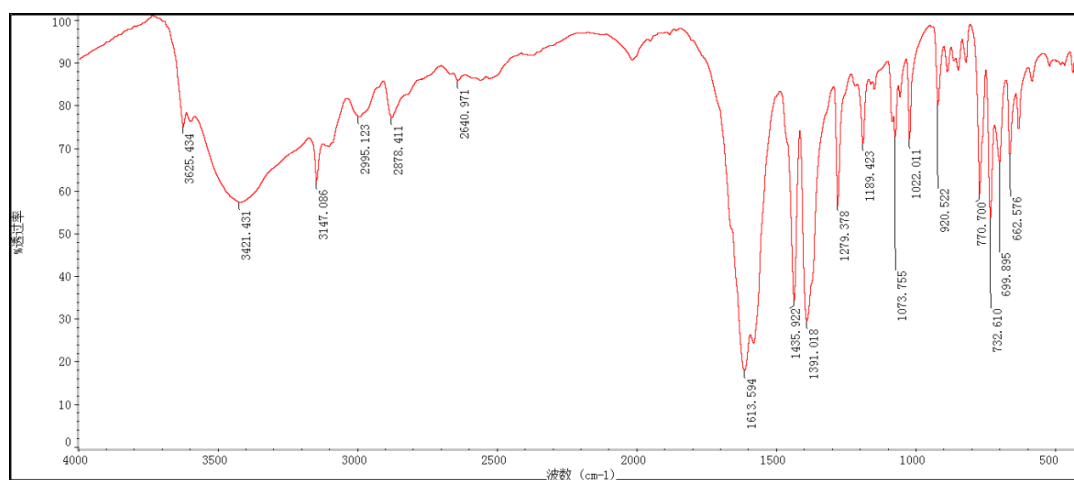

Fig. S2 IR spectrum of complex 2.

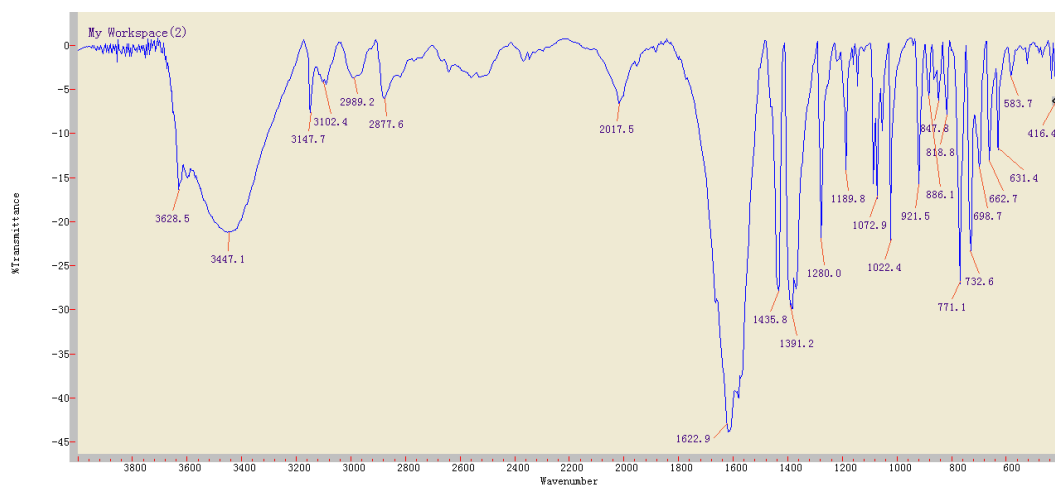

Fig. S3 IR spectrum of complex 3.

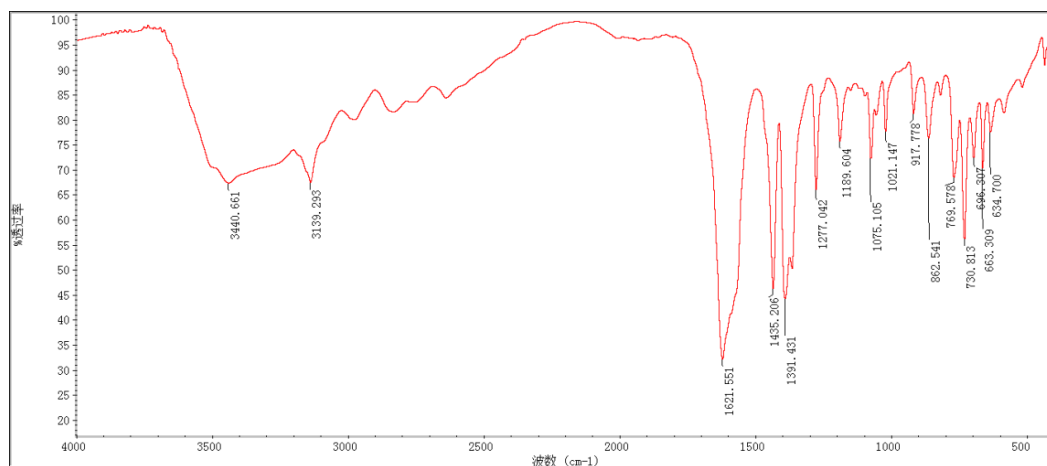

Fig. S4 IR spectrum of complex 4.

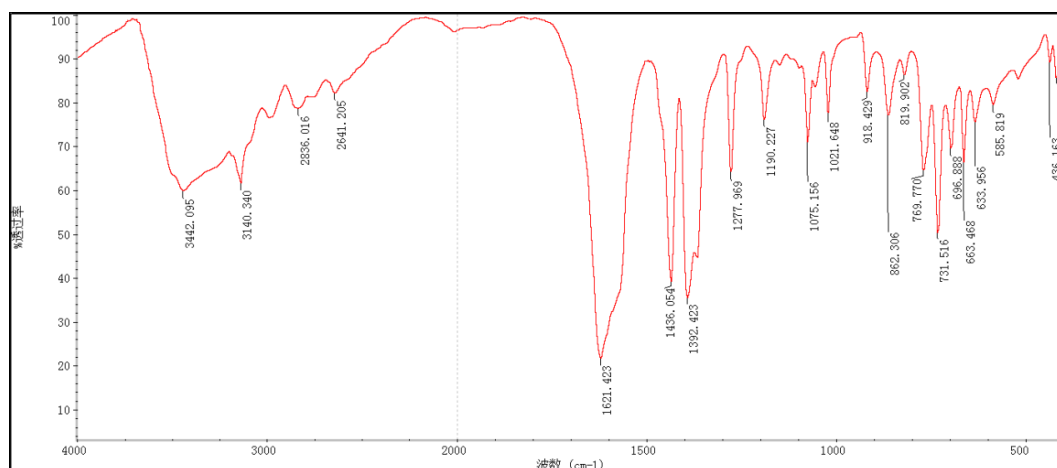

Fig. S5 IR spectrum of complex 5.

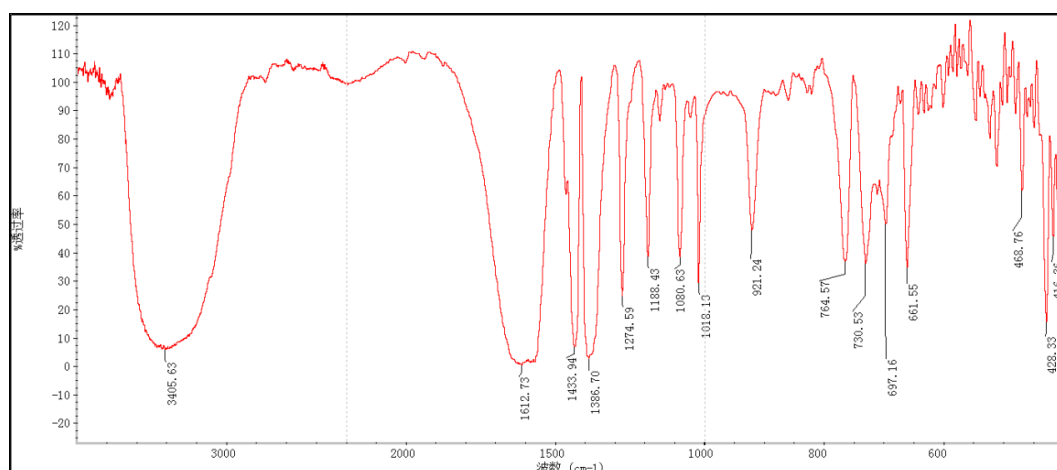

Fig. S6 IR spectrum of complex 6.

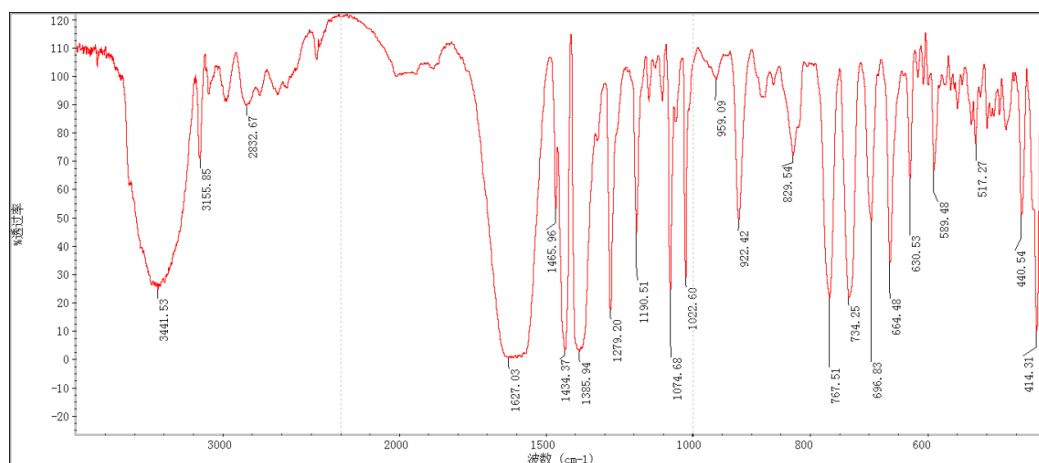

Fig. S7 IR spectrum of complex 7.

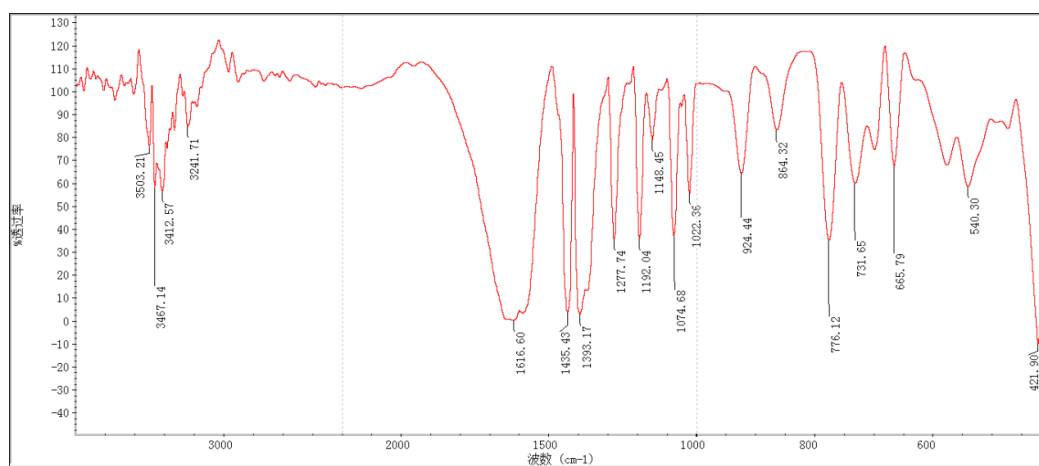

Fig. S8 IR spectrum of complex 8.



**Part 3. Low-temperature phosphorescence spectra of the complexes 2, 5, 6, 8.**

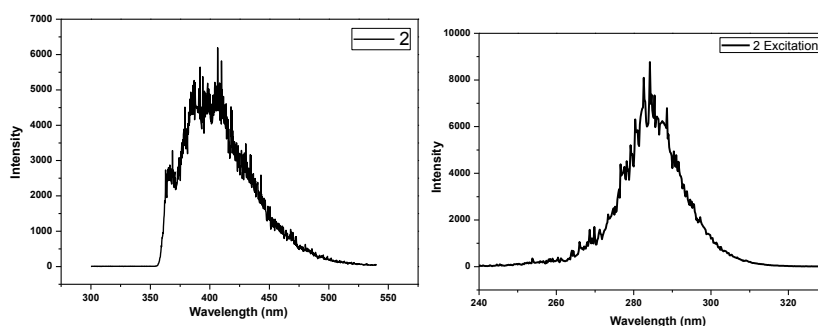

**Fig. S9** Low-temperature phosphorescence spectra of the complex 2.

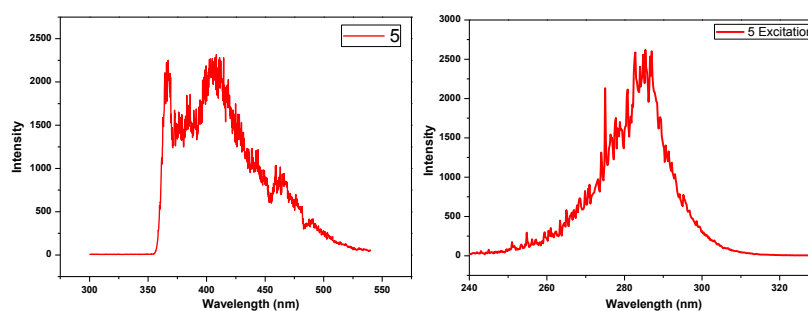

**Fig. S10** Low-temperature phosphorescence spectra of the complex 5.

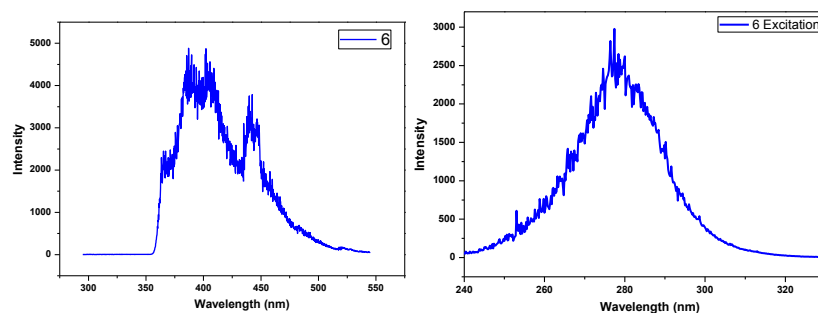

**Fig. S11** Low-temperature phosphorescence spectra of the complex 6.

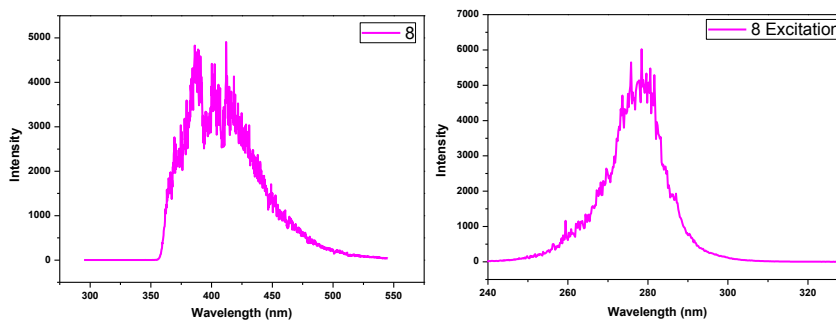

**Fig. S12** Low-temperature phosphorescence spectra of the complex 8.

**Fig. S13** PXRD spectra of the complex **1-8**.

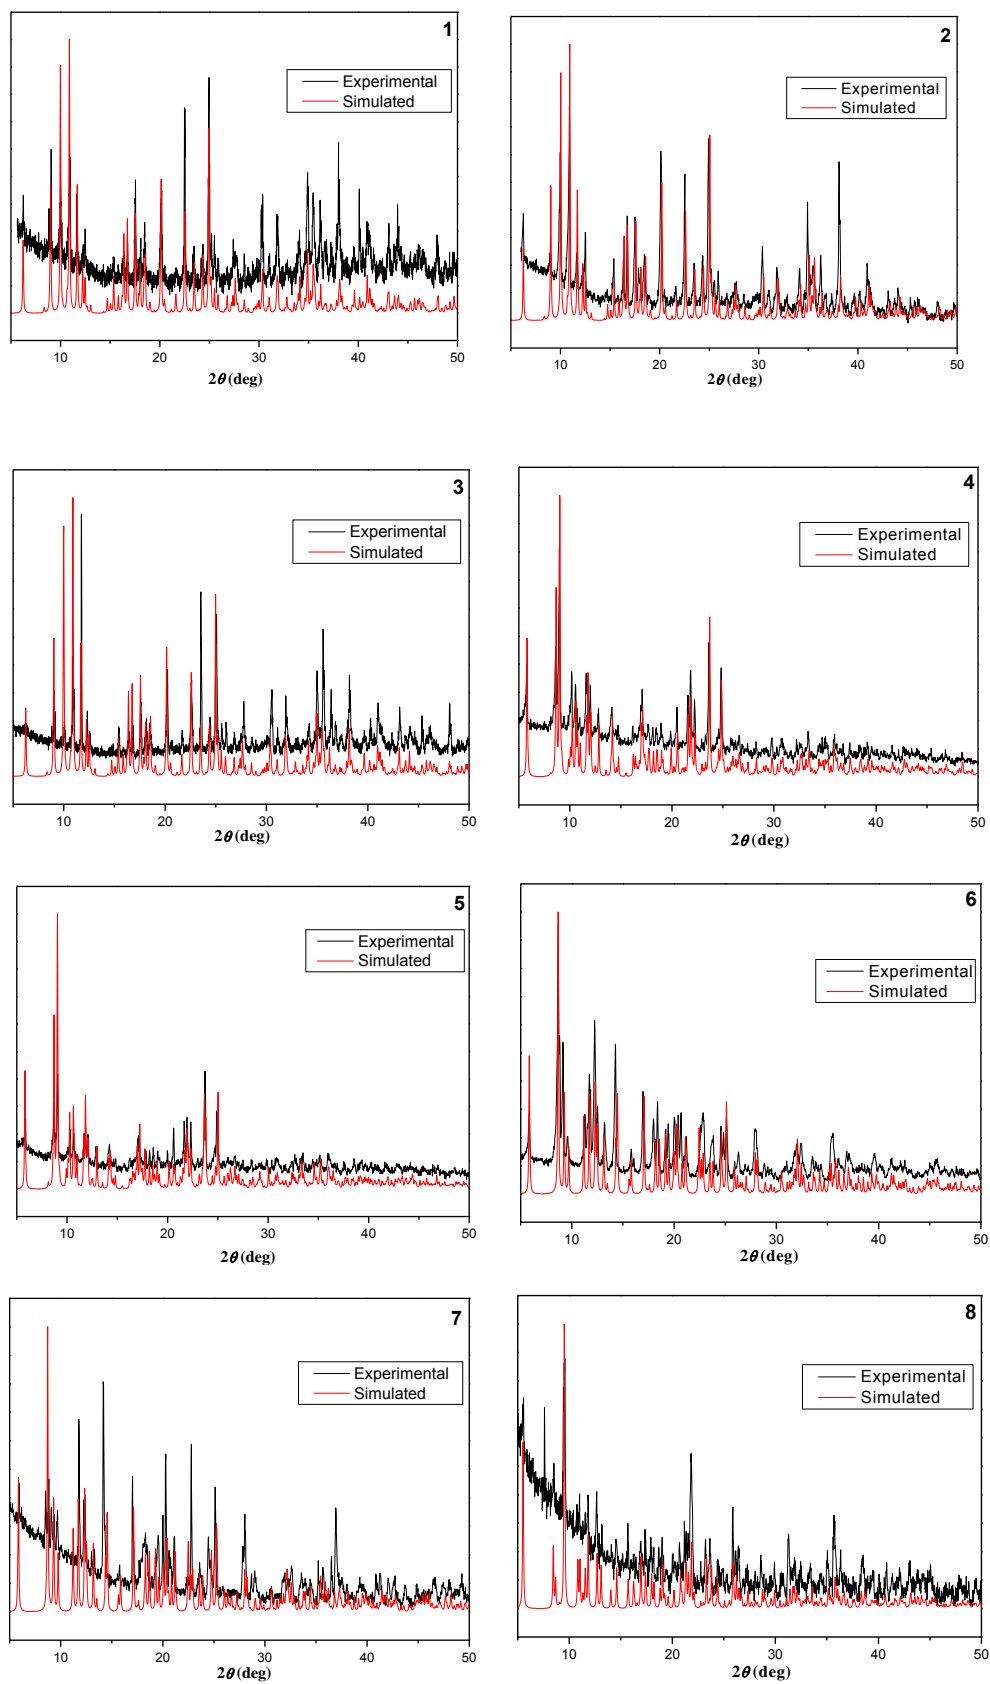

Supplement: c3dt51184g.pdf [file c3dt51184g.pdf]
